# Supplementary material for: Potential Climate Impacts of Hydrological Alterations and Discharge Variabilities of the Mura, Drava, and Danube Rivers on the Natural Resources of the MDD UNESCO Biosphere Reserve
Source: MDPI journal article supplement (doi:10.3390/cli10100139), 2022-09-25

HOMOGENEITY TESTS

Table S1:

| The Mura River ( Leteney)–IHA homogeneity test |  |                                                                                                                                                        |  |
|------------------------------------------------|--|--------------------------------------------------------------------------------------------------------------------------------------------------------|--|
| Parameter group 1                              |  |                                                                                                                                                        |  |
| October                                        |  | <div>October</div> 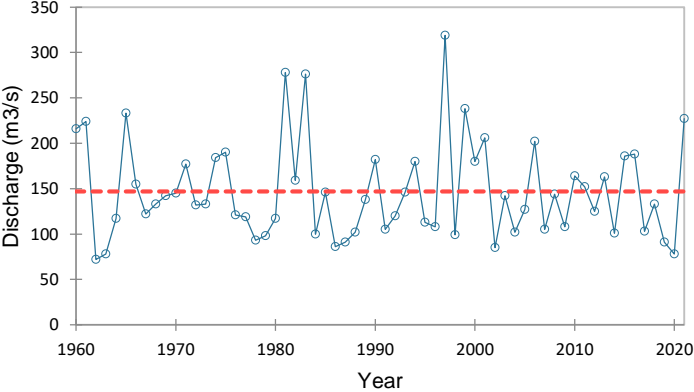 <div>—○— October    - - - mu = 146,758</div>     |  |
| November                                       |  | <div>November</div>  <div>—○— November    - - - mu = 149,202</div> |  |

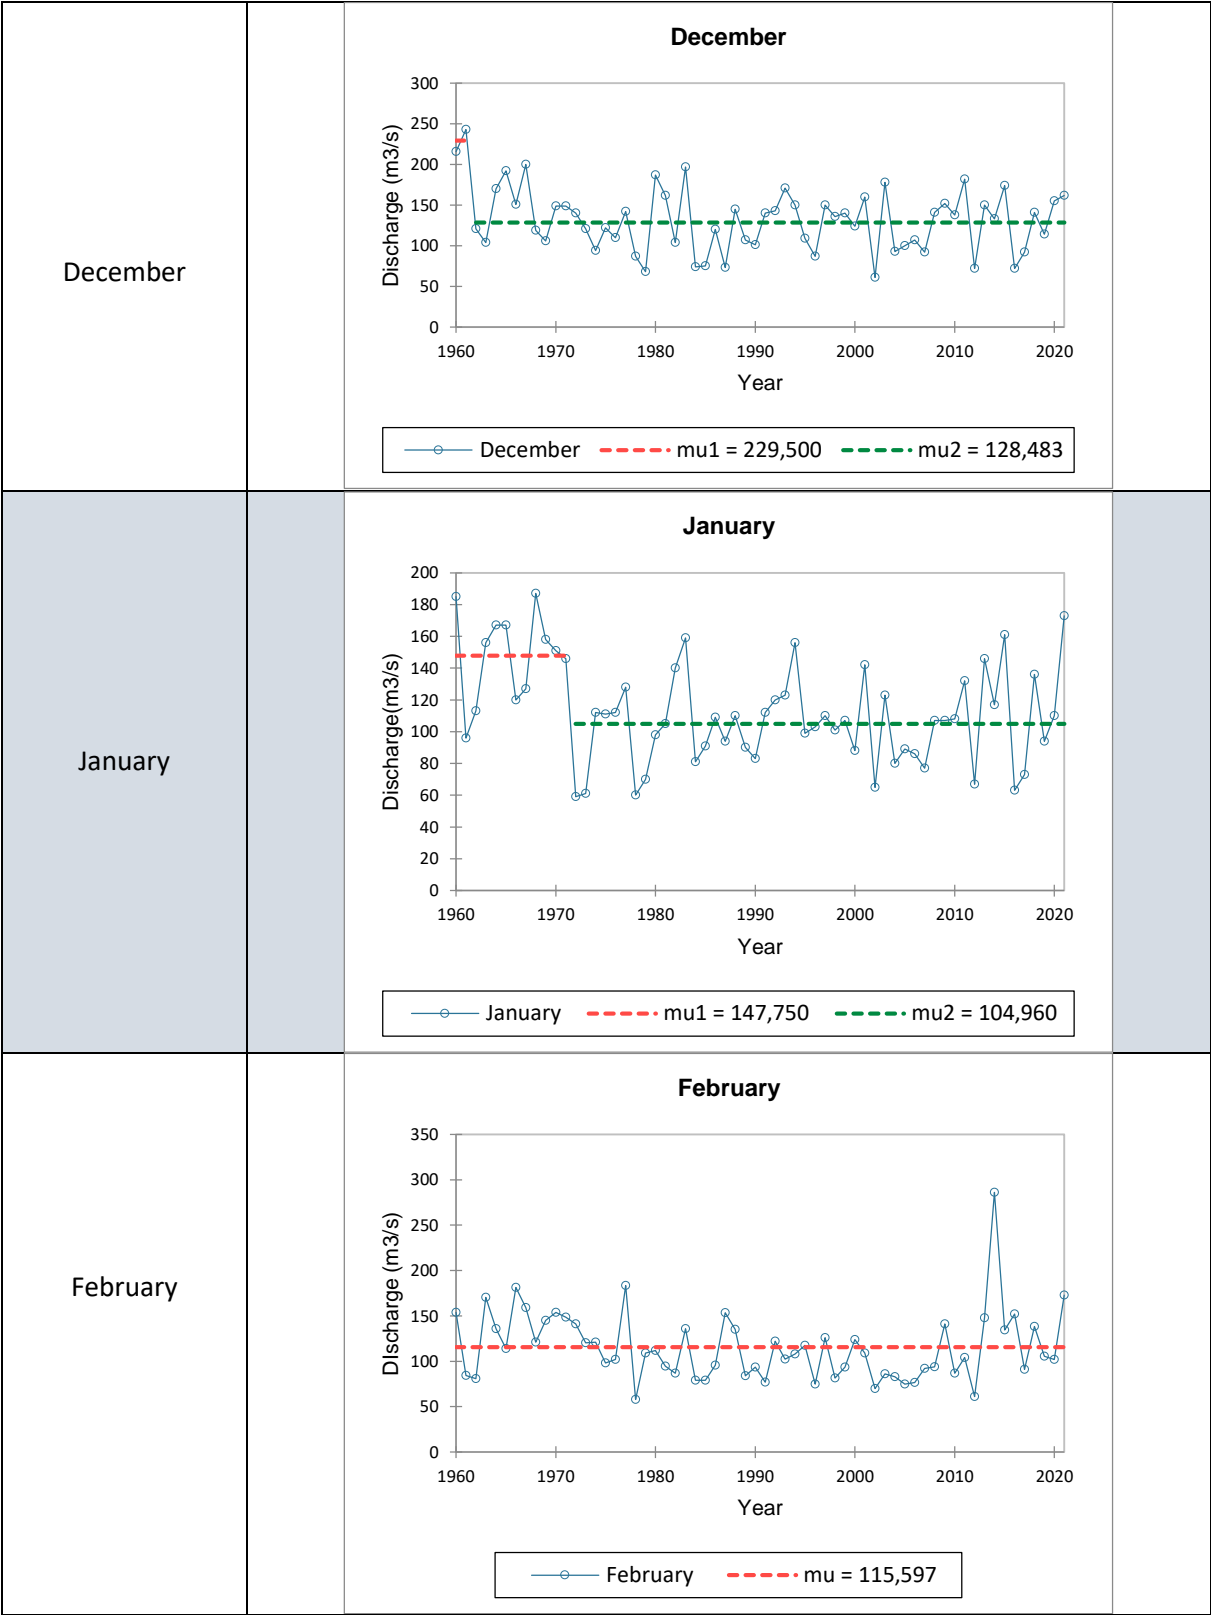

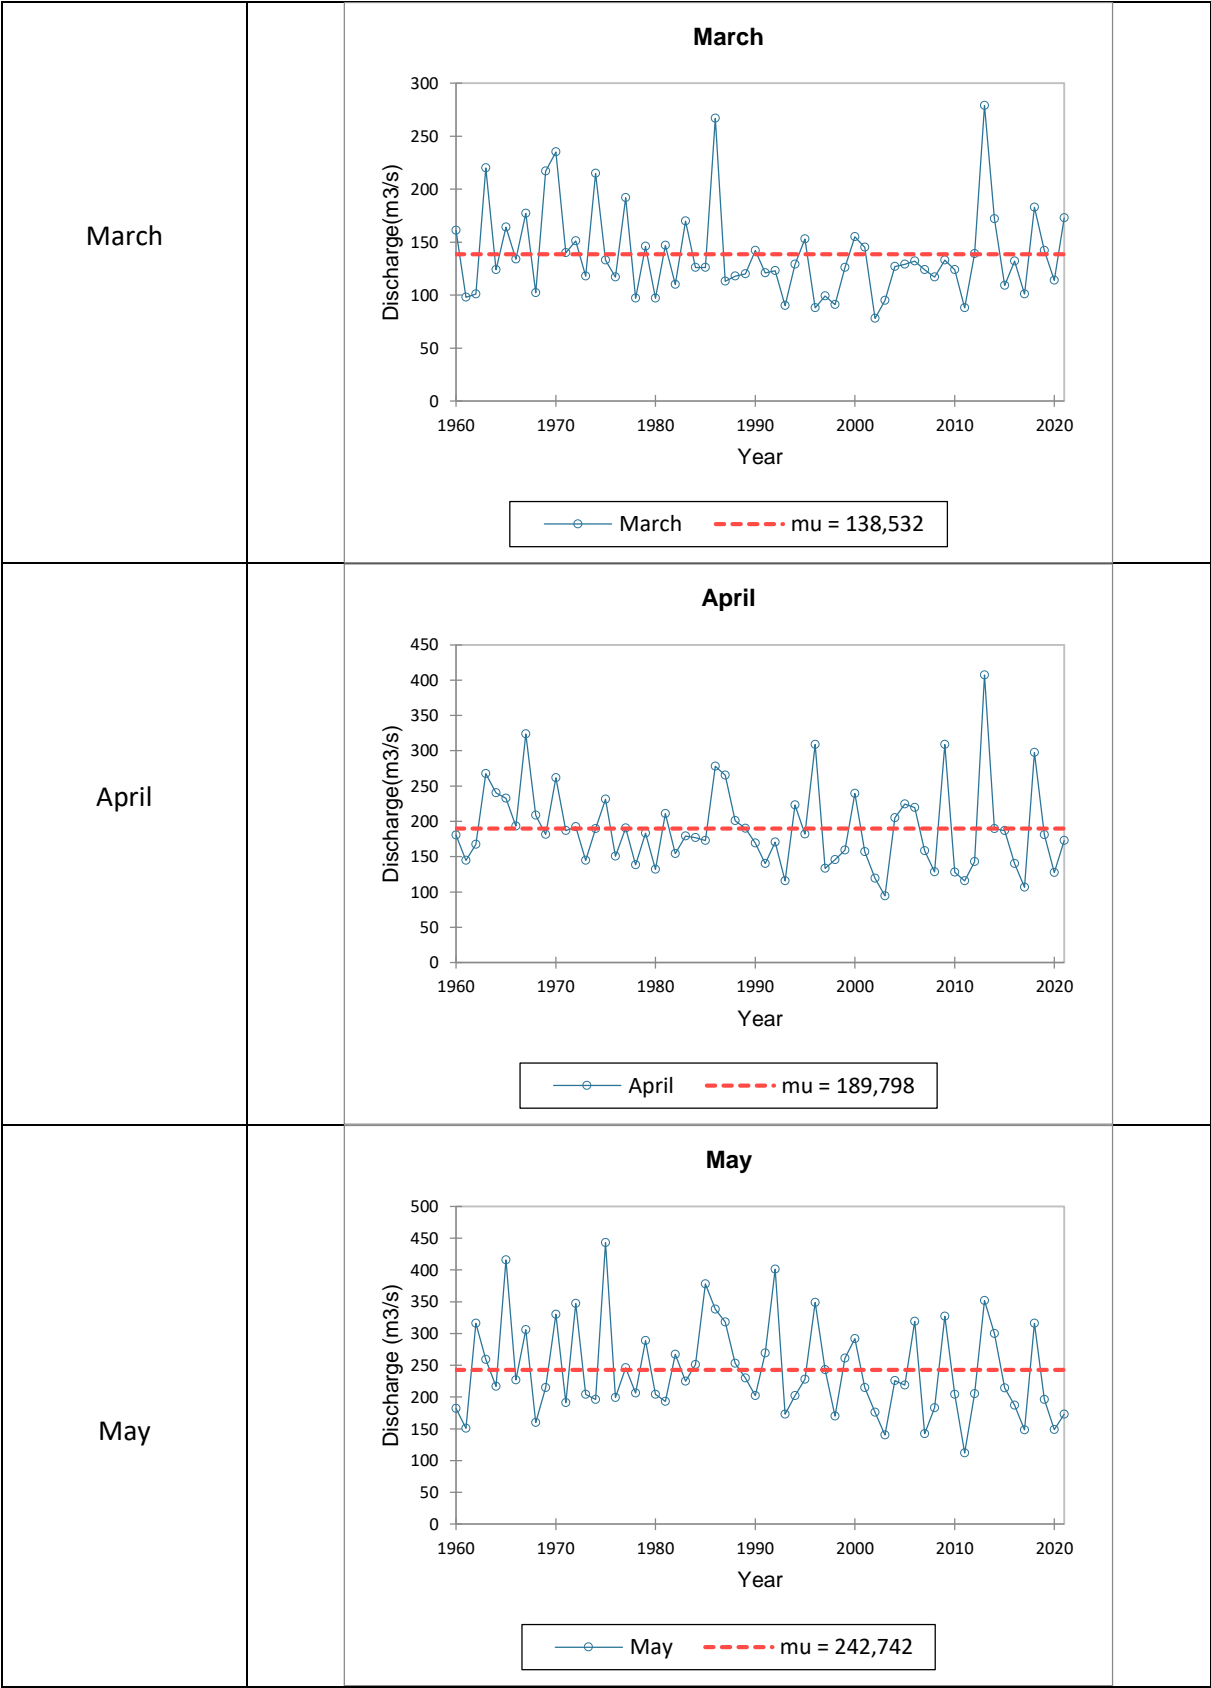

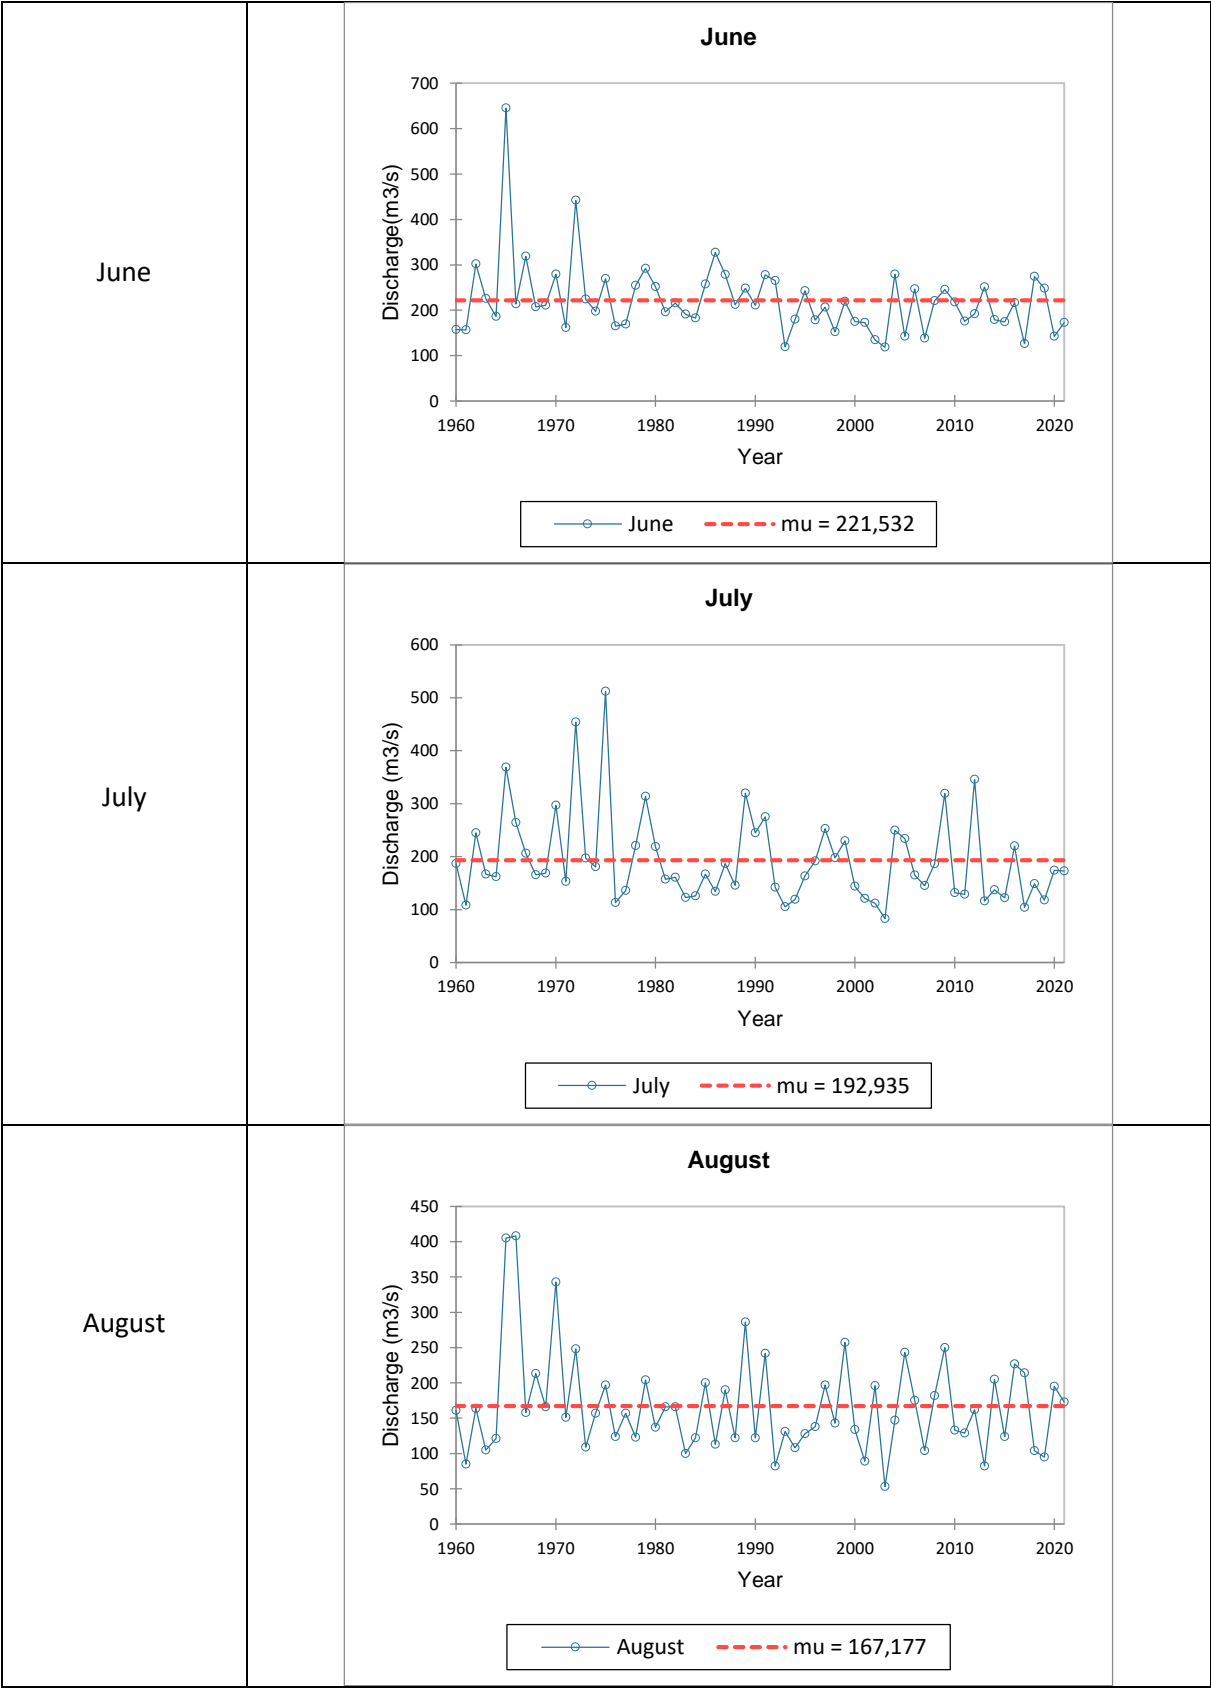

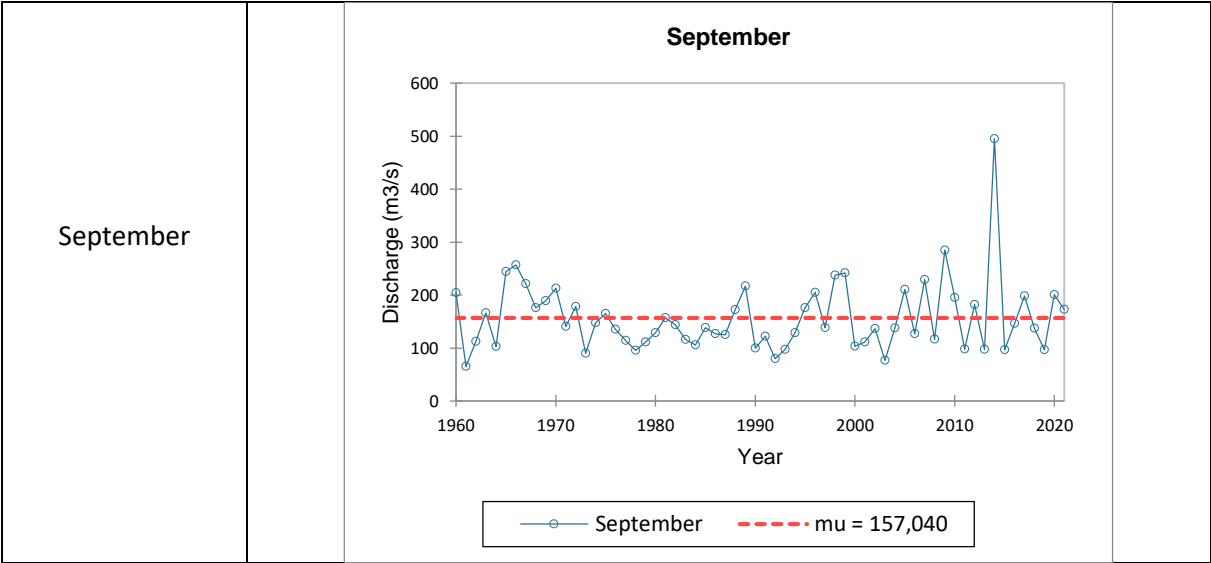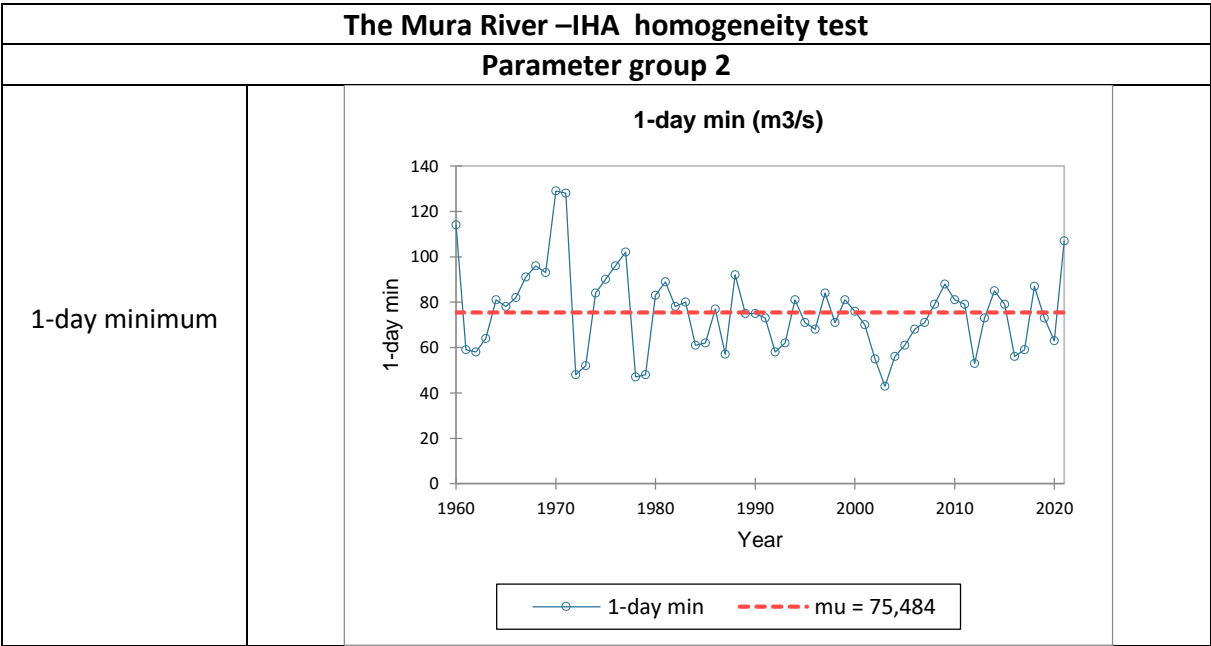

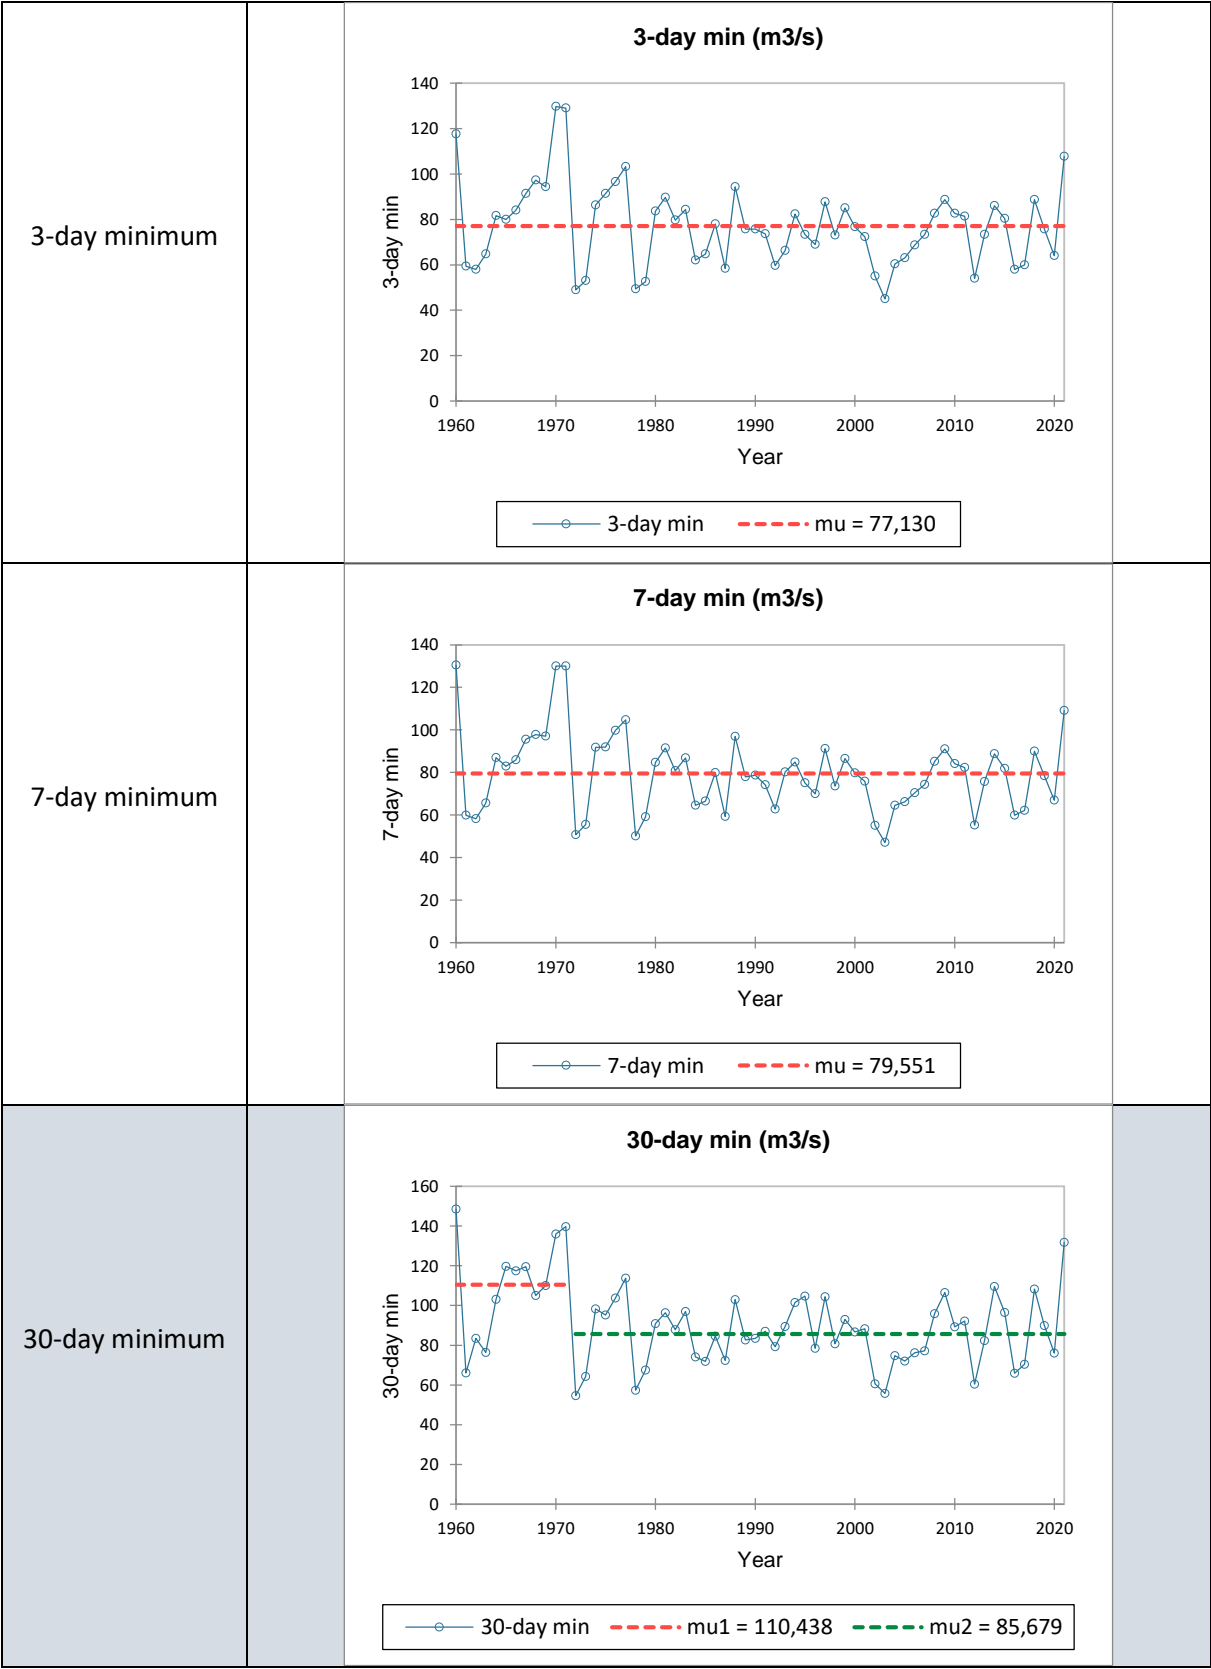

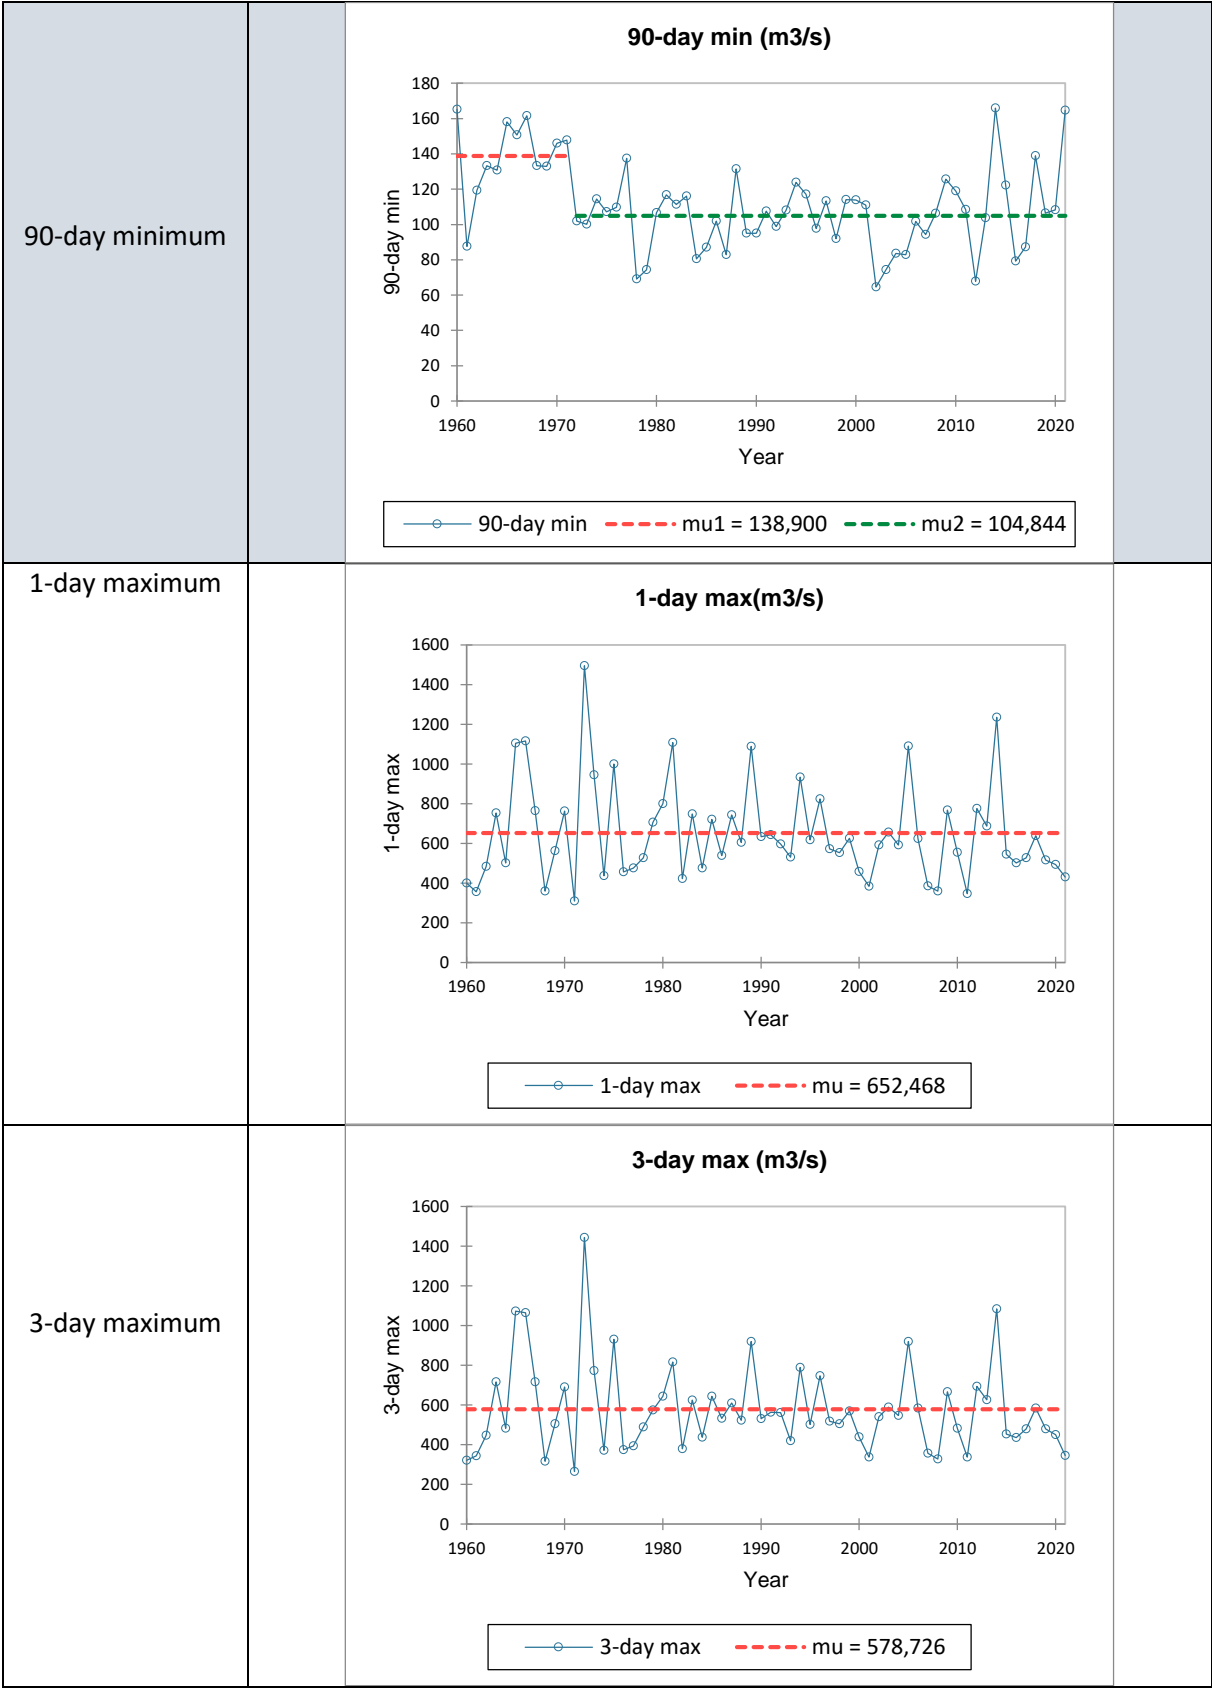

|                |                                                                                                                                                                                                                                            |
|----------------|--------------------------------------------------------------------------------------------------------------------------------------------------------------------------------------------------------------------------------------------|
| 7-day maximum  | <div data-bbox="536 190 1307 745"> <p><b>7-day max (m3/s)</b></p> 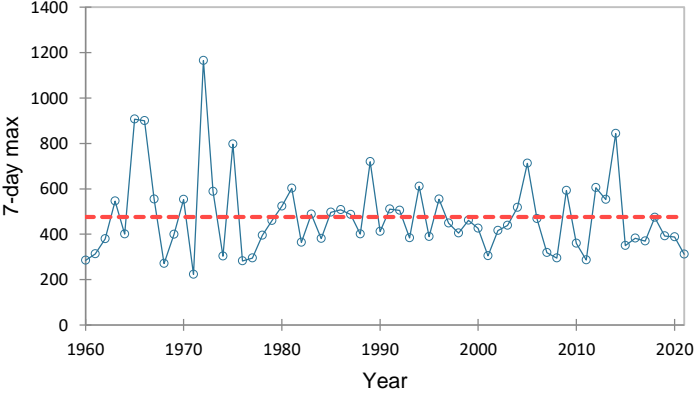 <p>7-day max</p> <p>Year</p> <p>—○— 7-day max    - - - mu = 475,292</p> </div>        |
| 30-day maximum | <div data-bbox="536 745 1307 1310"> <p><b>30-day max (m3/s)</b></p>  <p>30-day max</p> <p>Year</p> <p>—○— 30-day max    - - - mu = 332,289</p> </div>   |
| 90-day maximum | <div data-bbox="536 1310 1307 1865"> <p><b>90-day max (m3/s)</b></p>  <p>90-day max</p> <p>Year</p> <p>—○— 90-day max    - - - mu = 263,989</p> </div> |

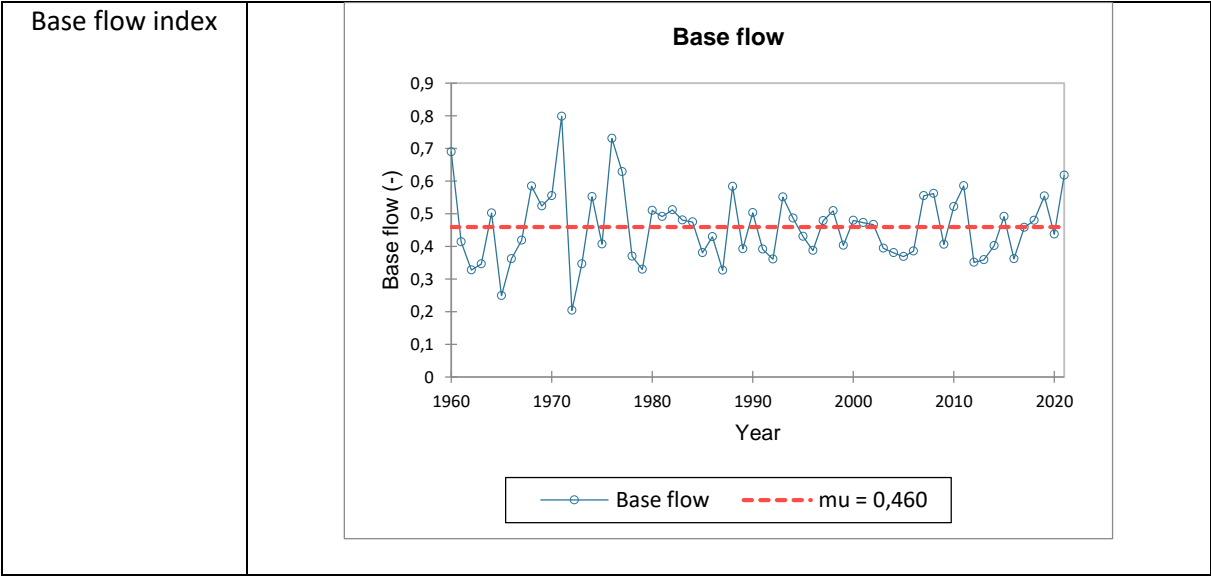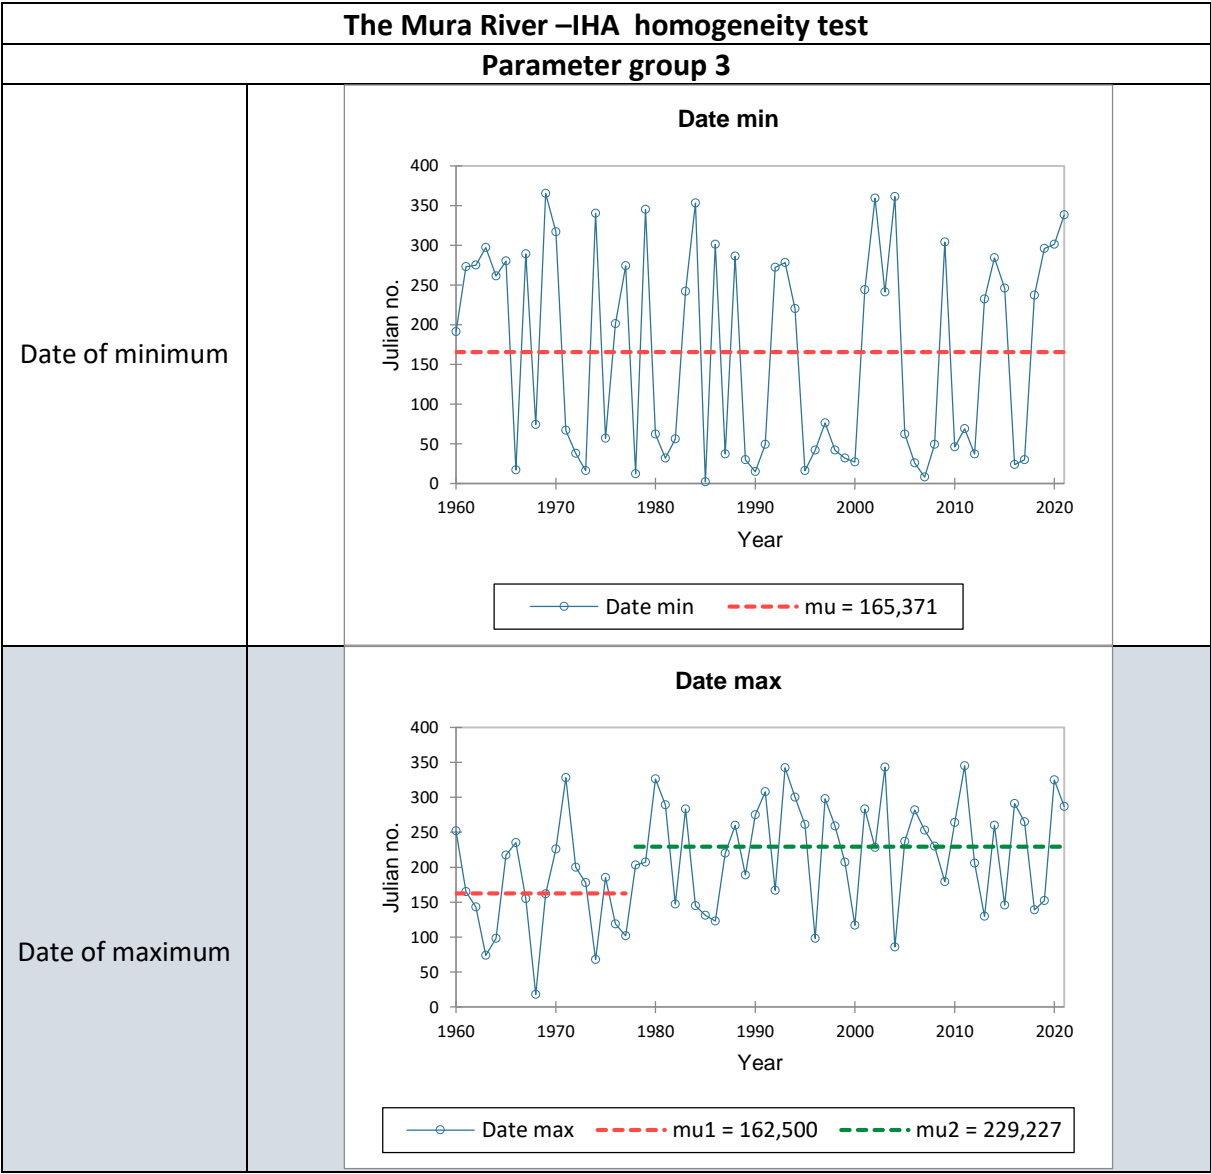

The Mura River –IHA homogeneity test

Parameter group 4

Low pulse count

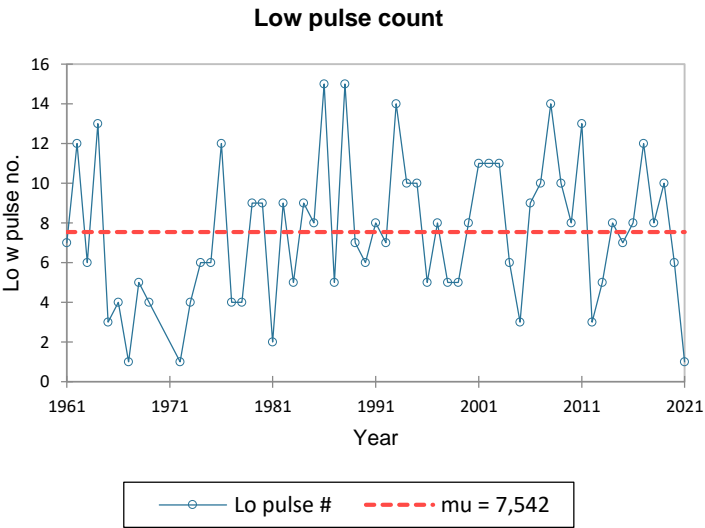

Low pulse duration

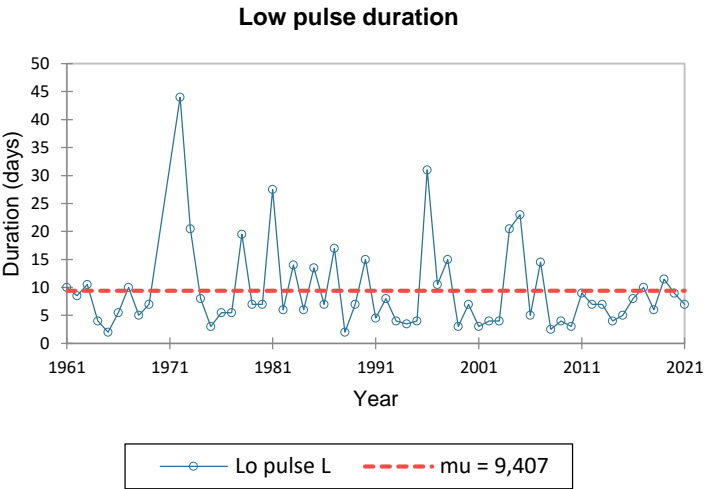

High pulse count

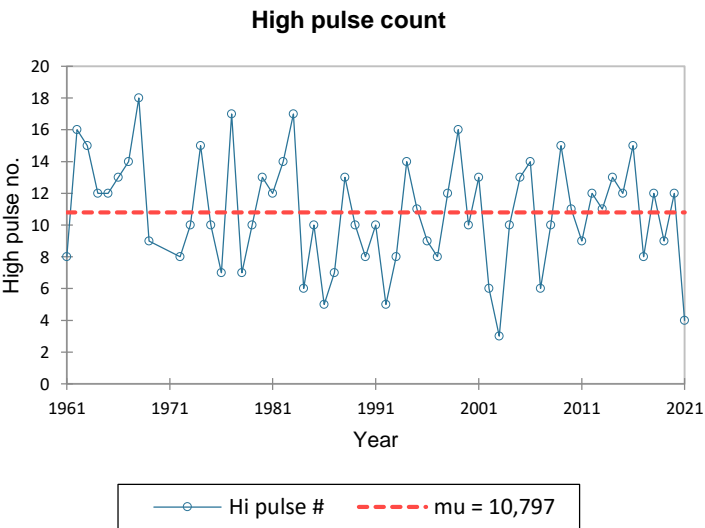

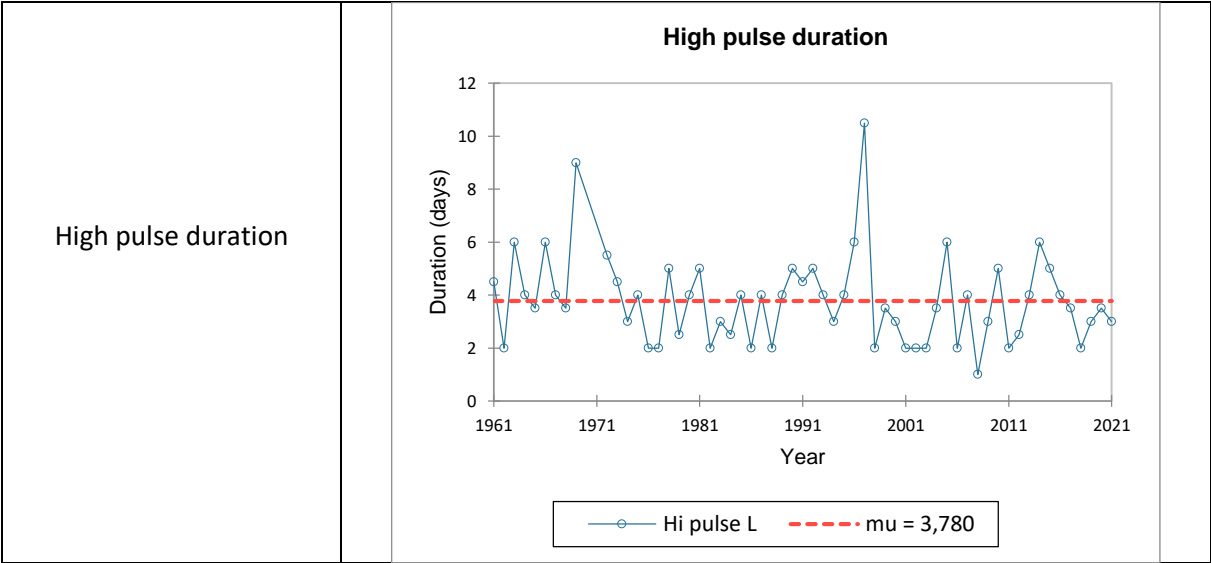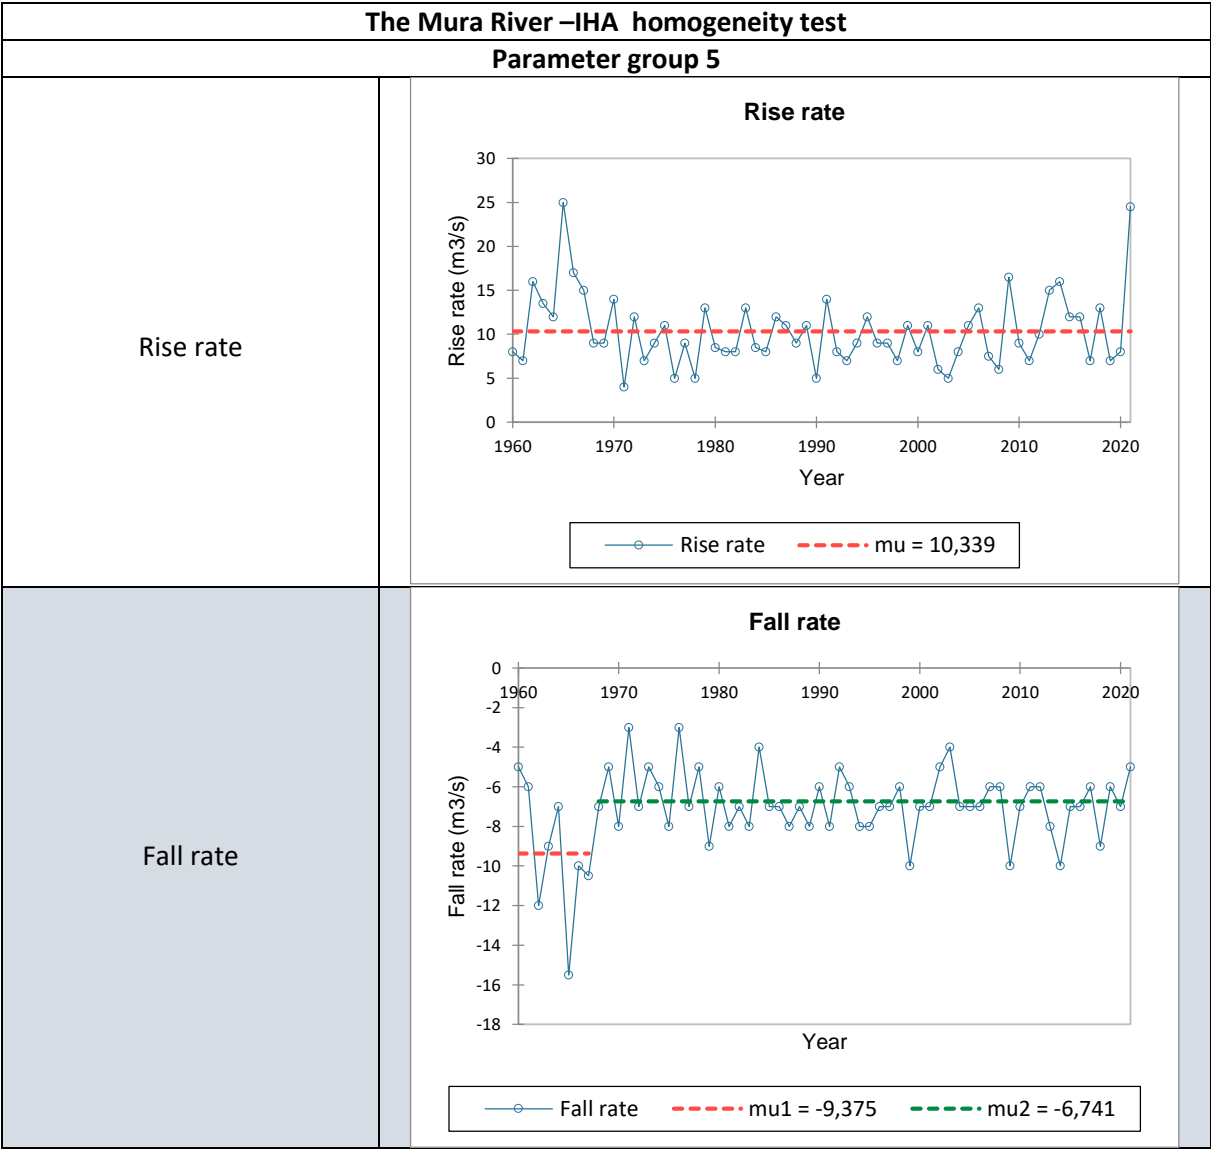

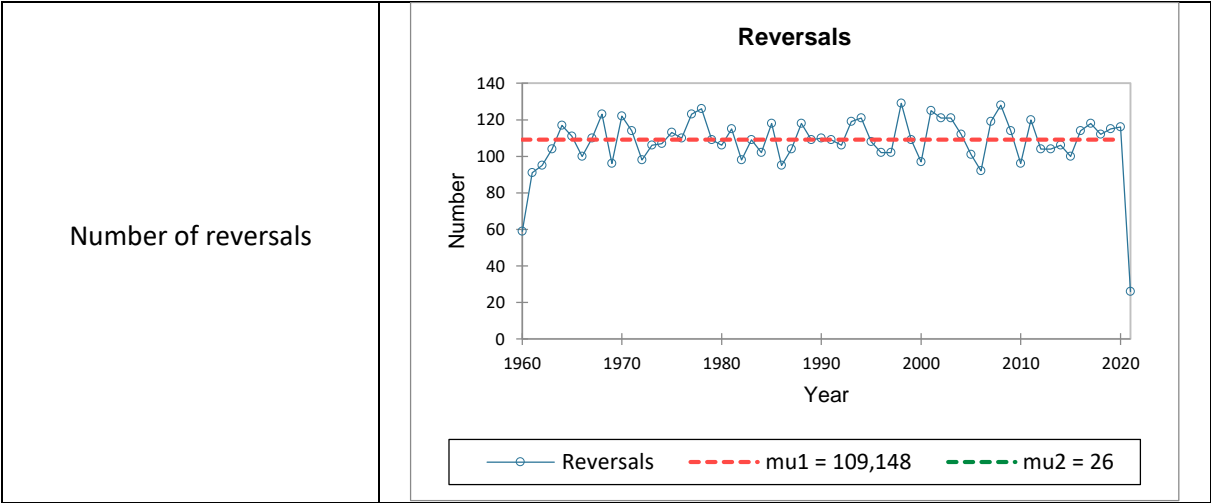

Table S2:

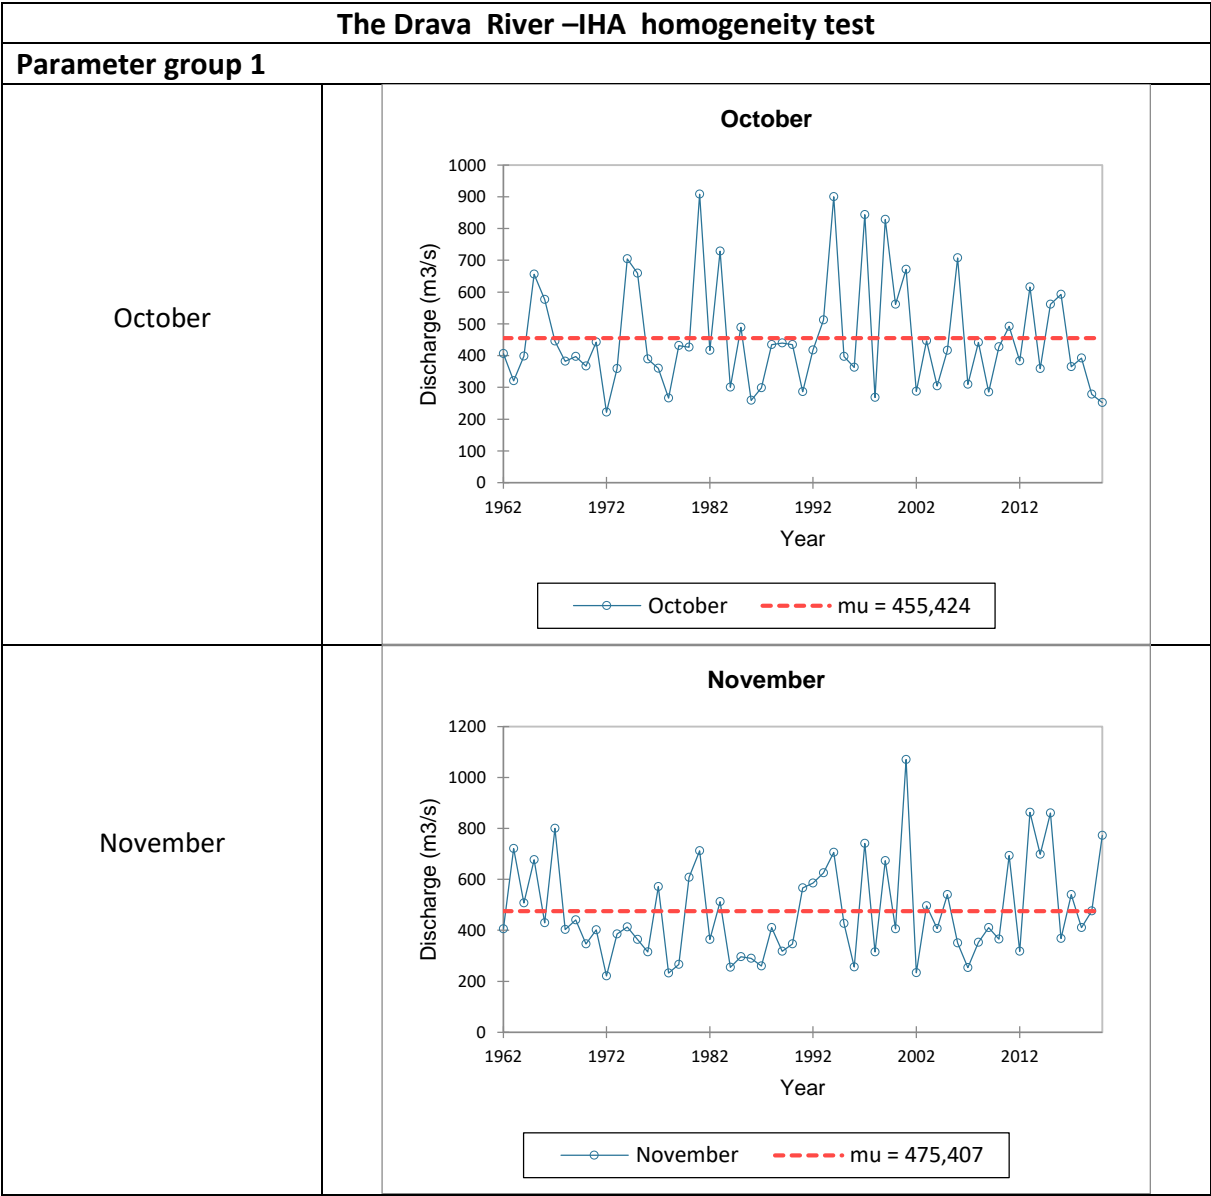

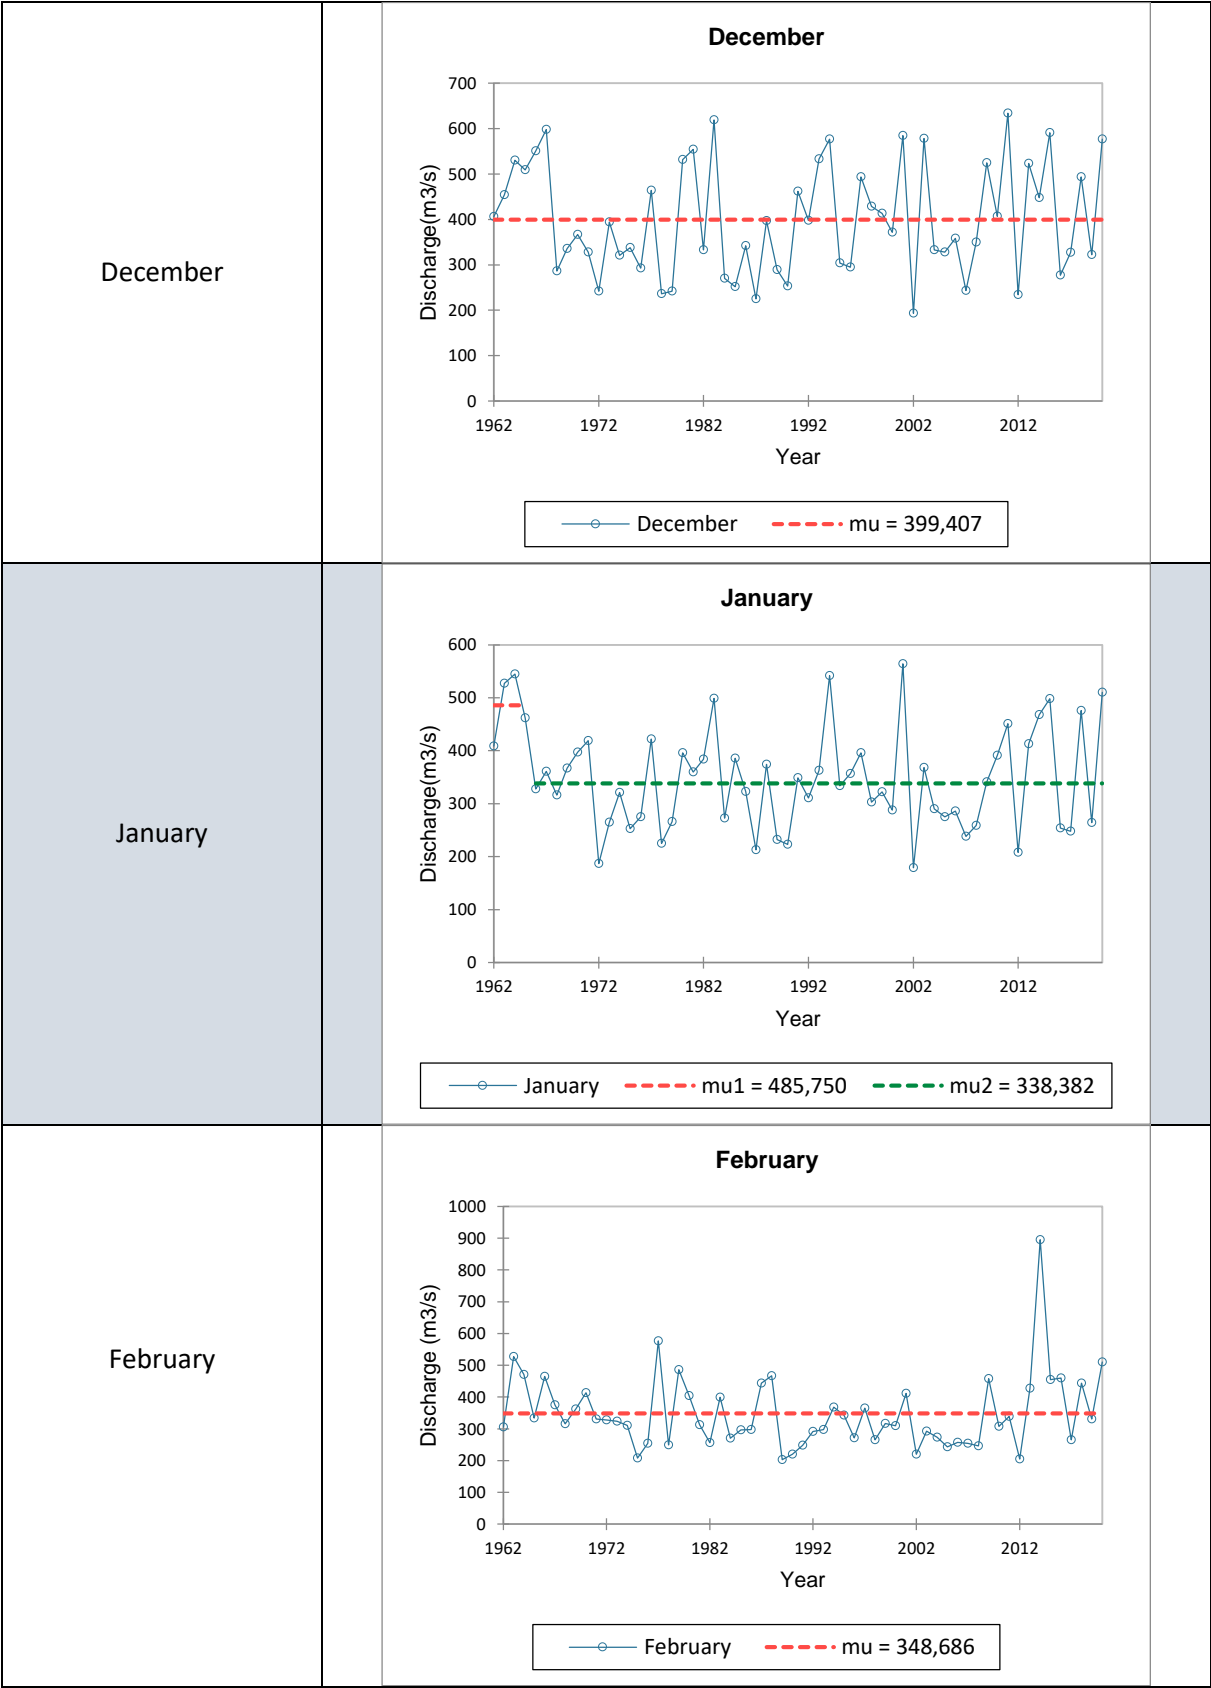

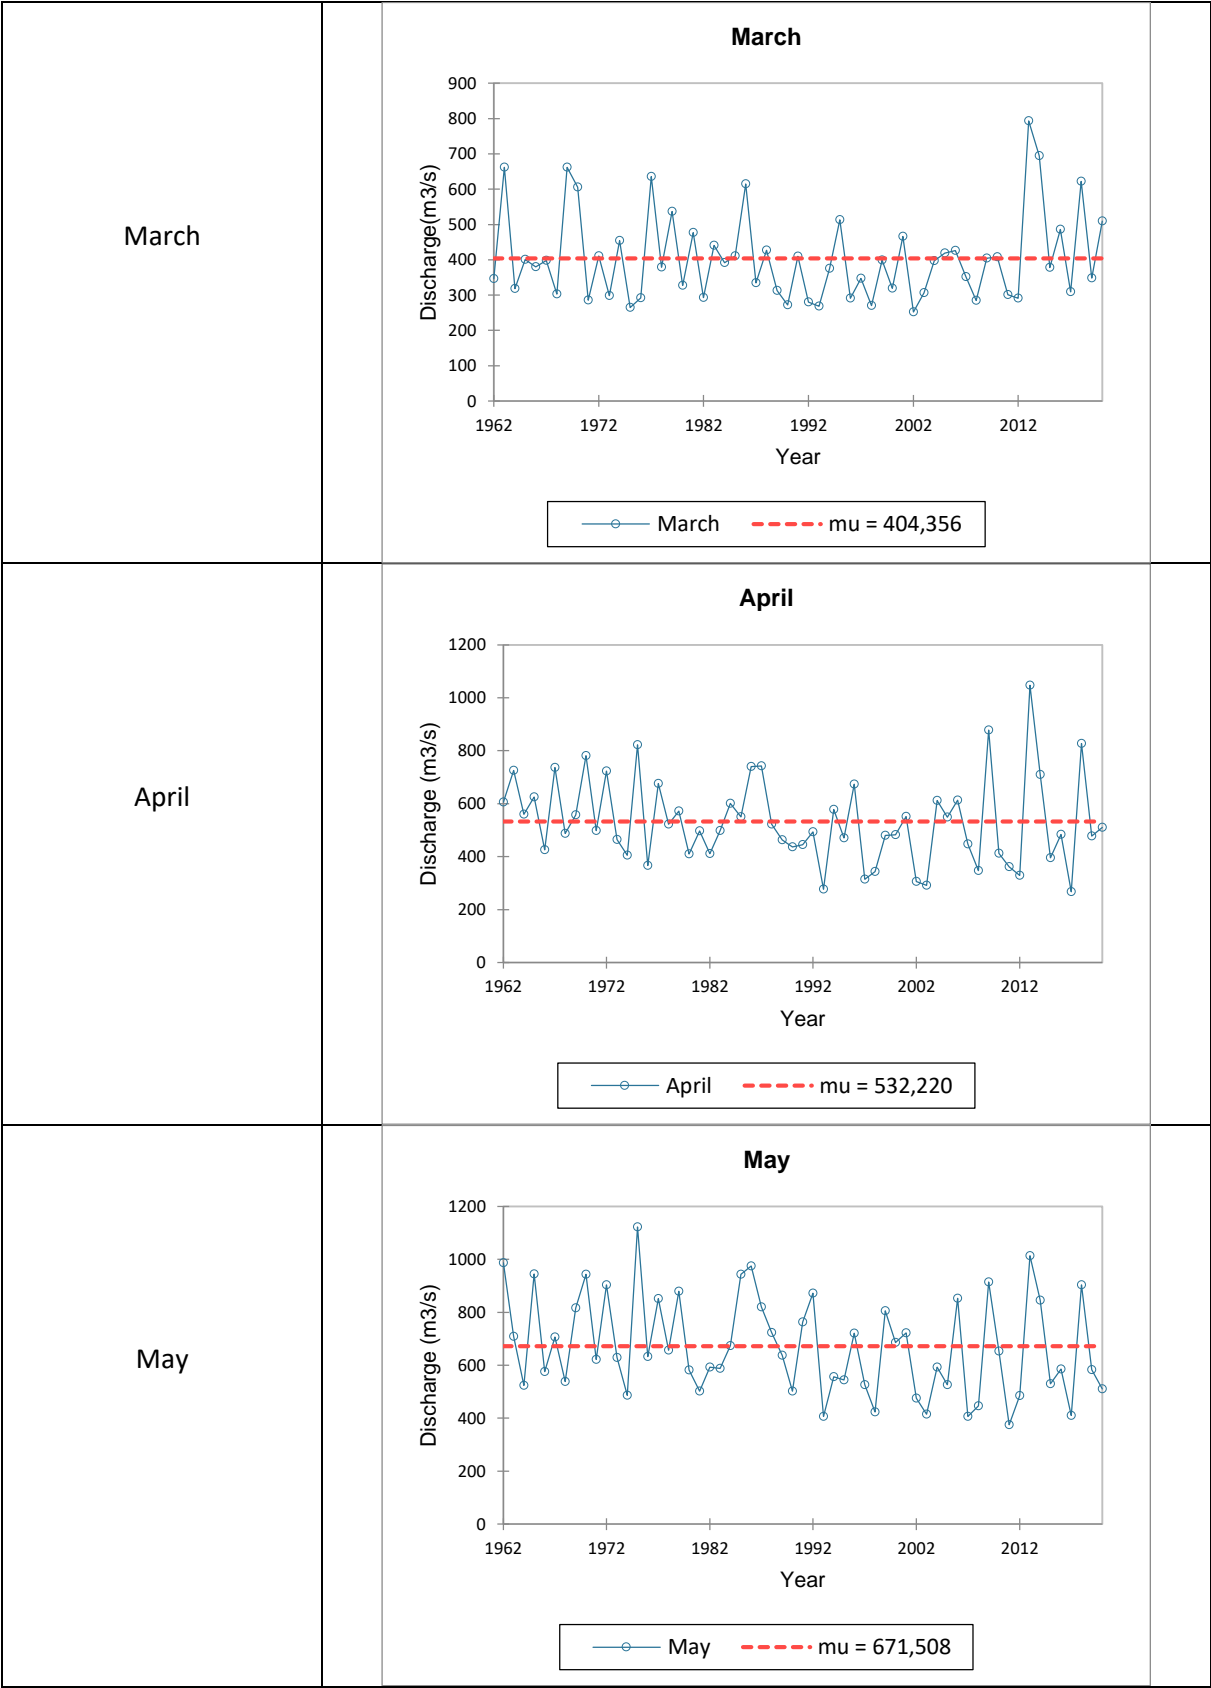

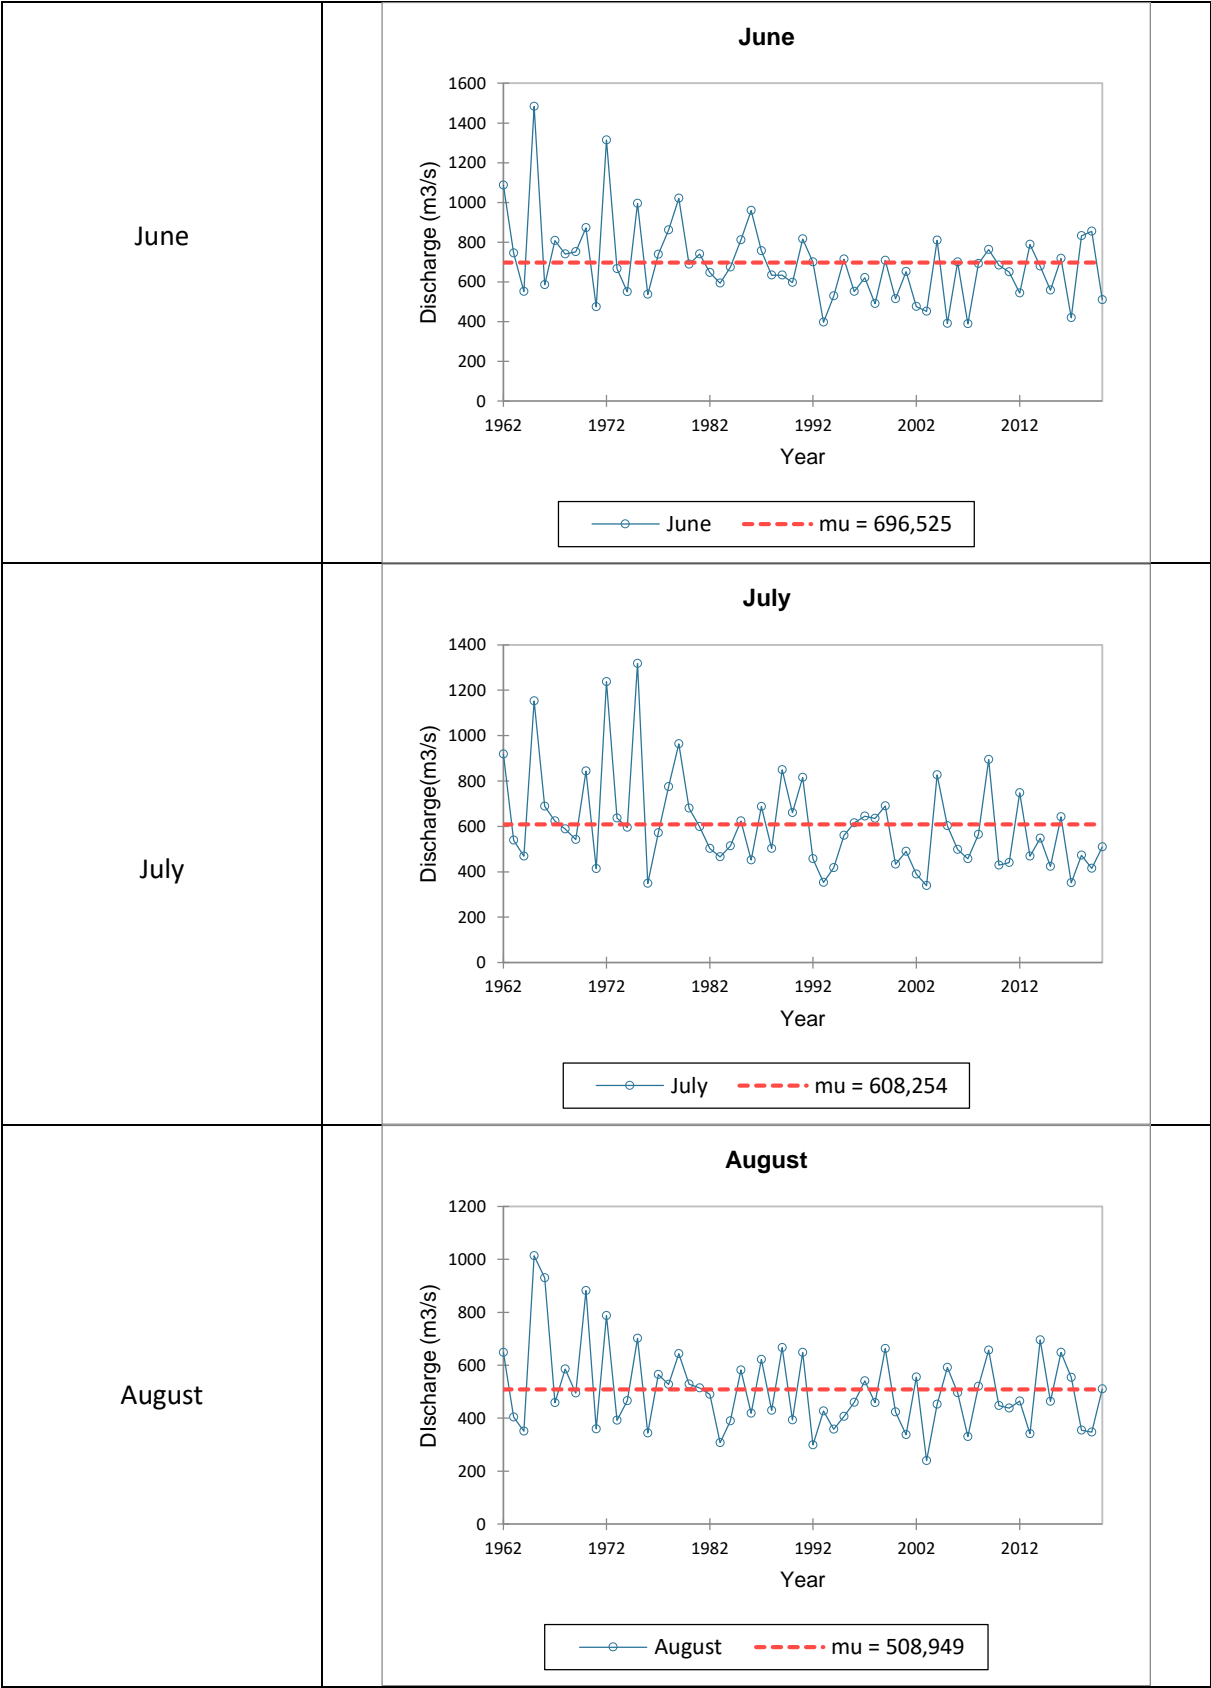

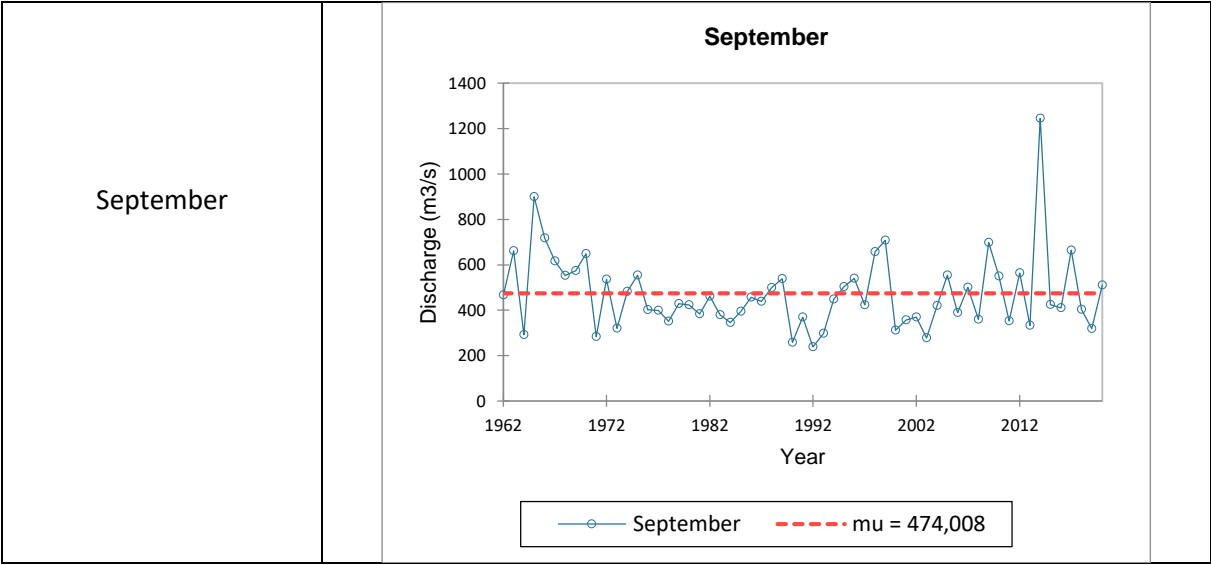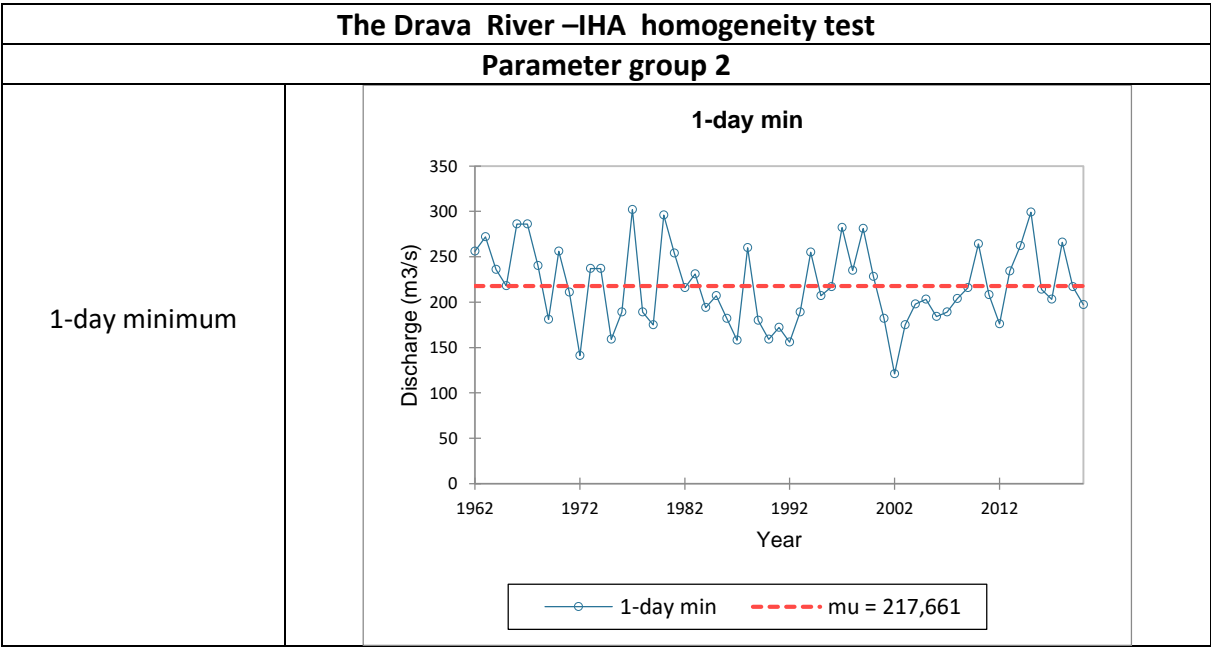

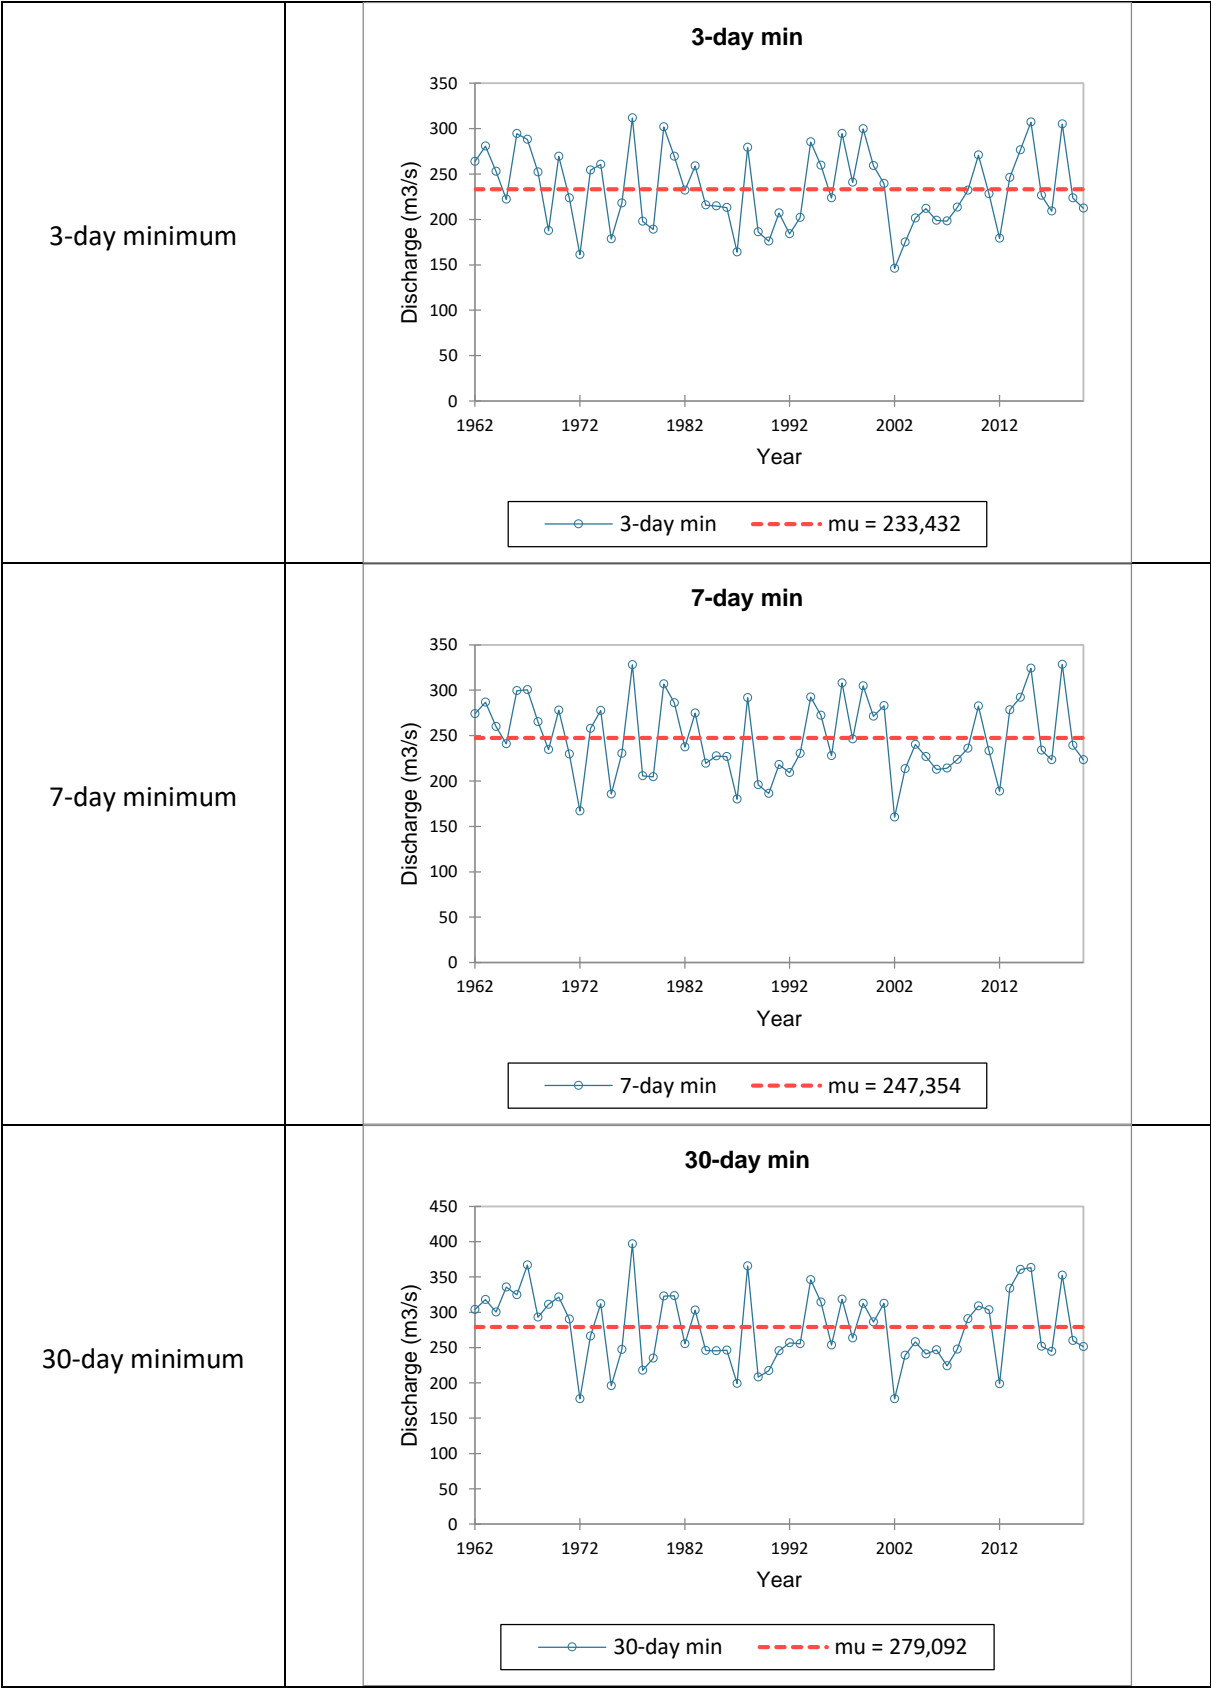

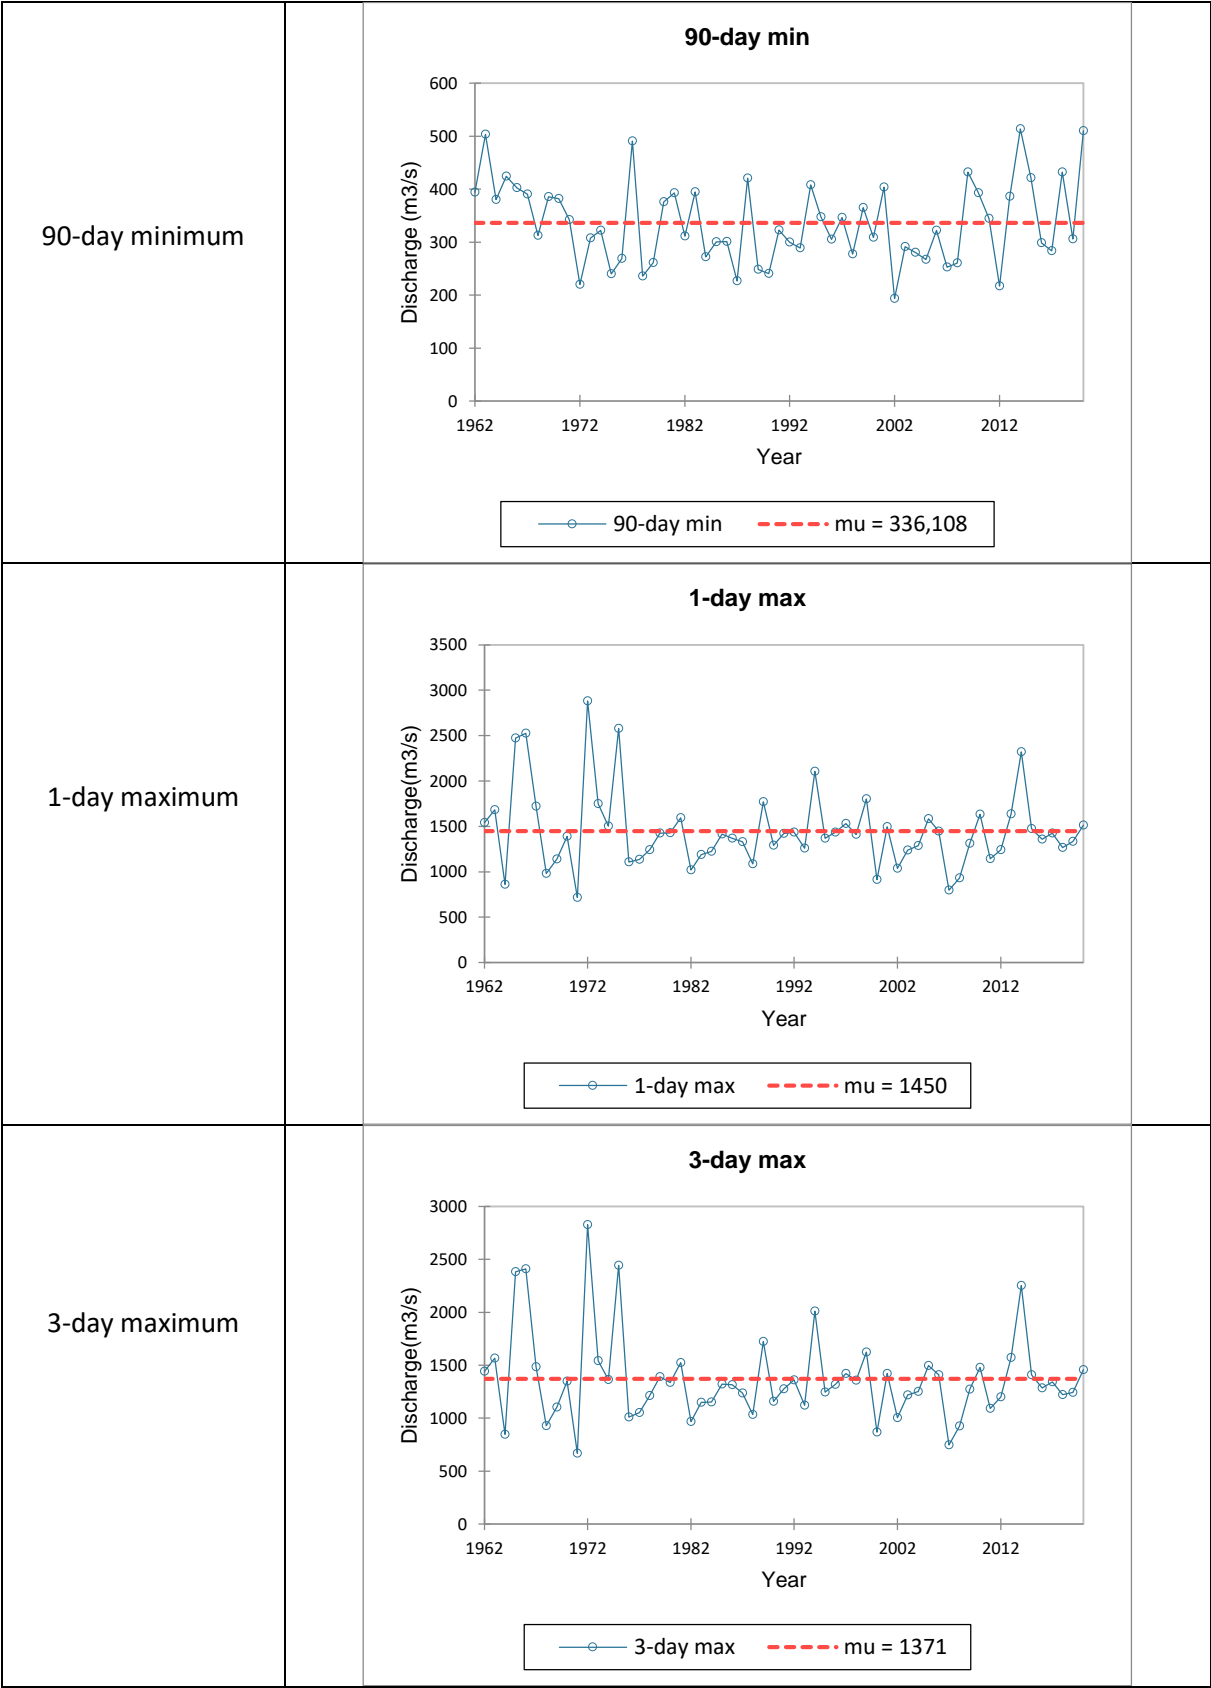

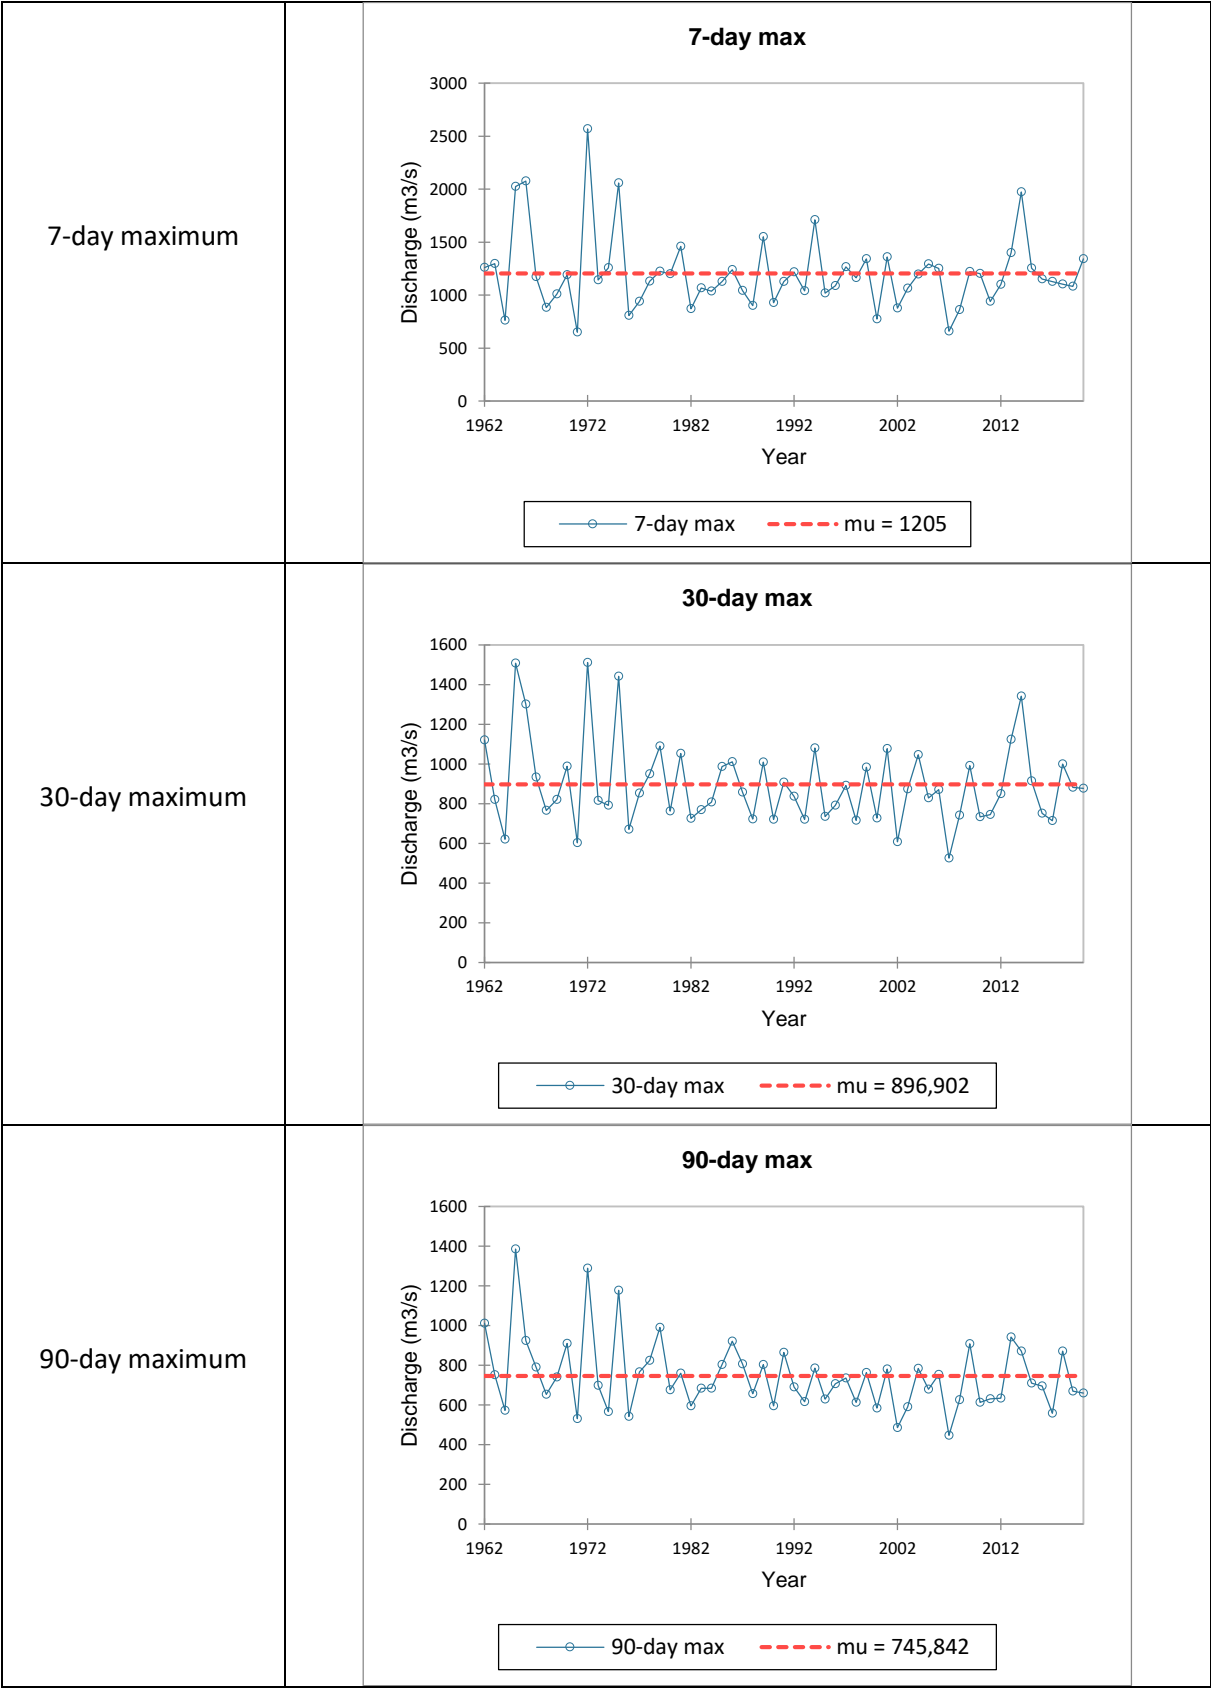

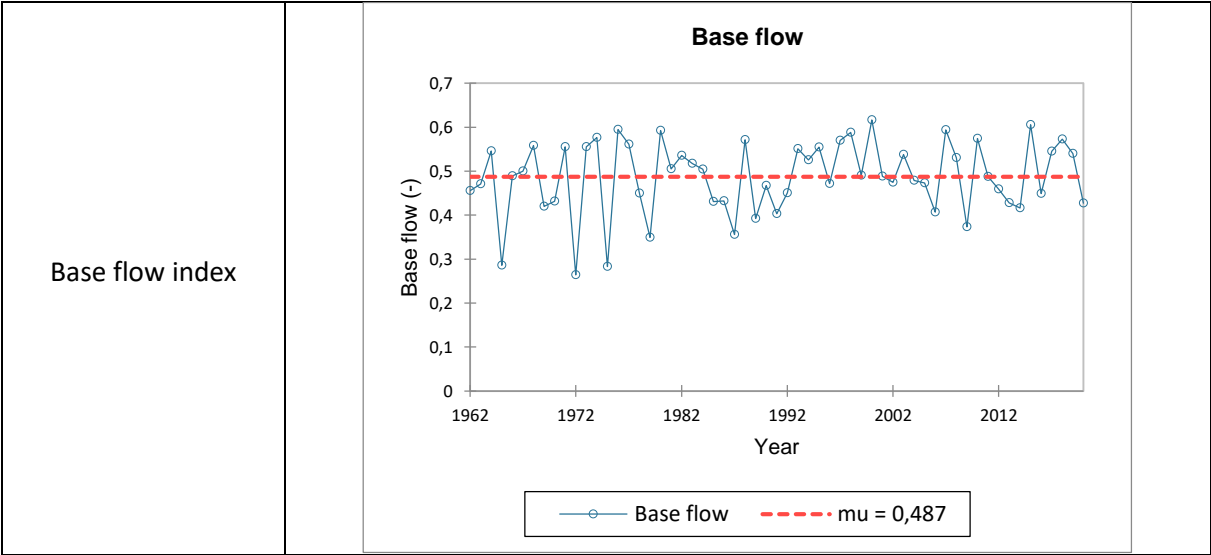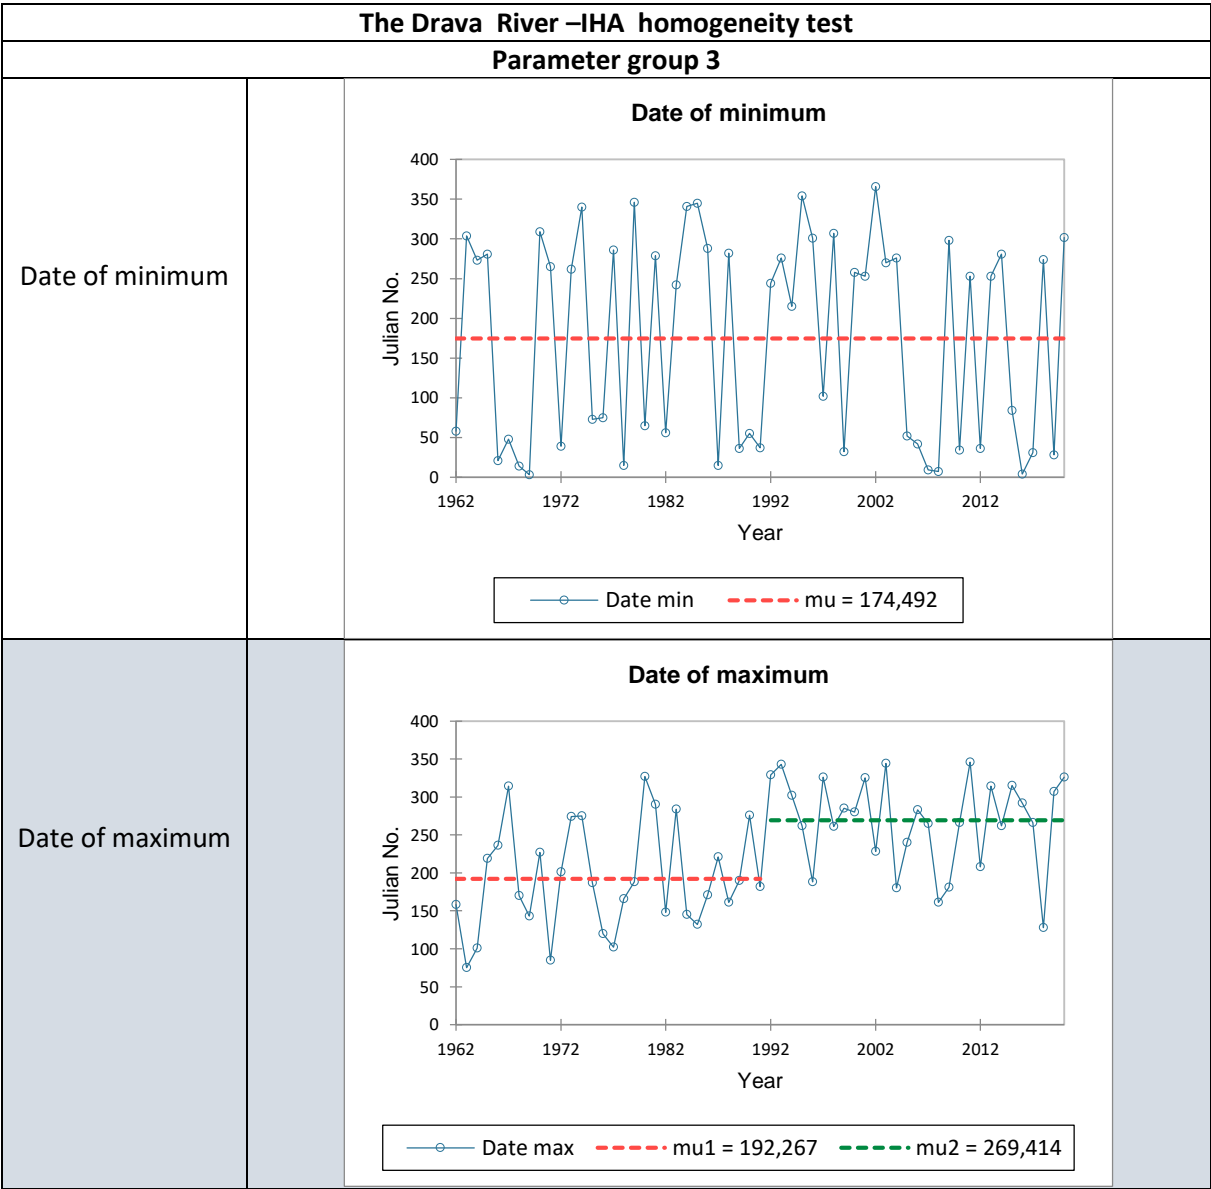

# The Drava River –IHA homogeneity test

## Parameter group 4

Low pulse count

### Low pulse count

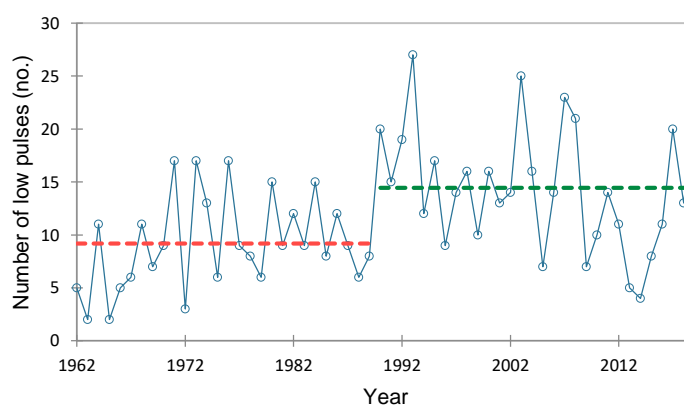

Lo pulse #     $\mu_1 = 9,179$      $\mu_2 = 14,433$

Low pulse duration

### Low pulse duration

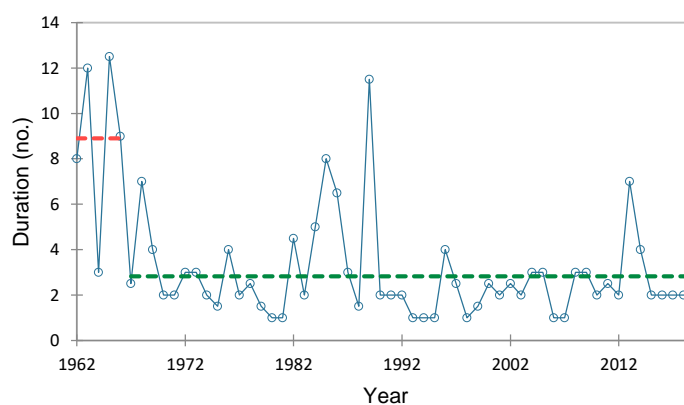

Lo pulse L     $\mu_1 = 8,900$      $\mu_2 = 2,821$

High pulse count

### High pulse count

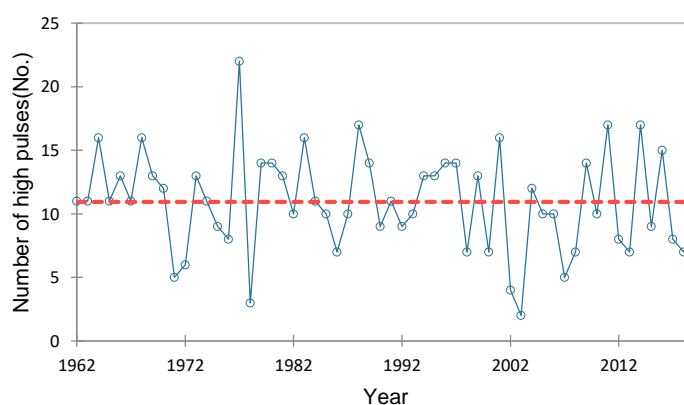

Hi pulse #     $\mu = 10,948$

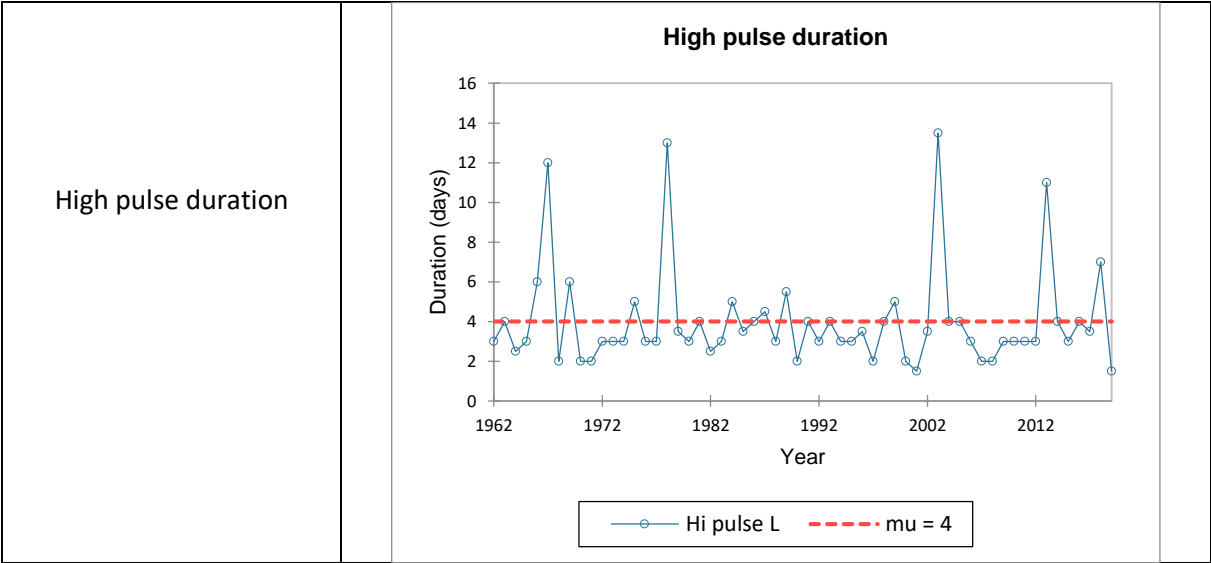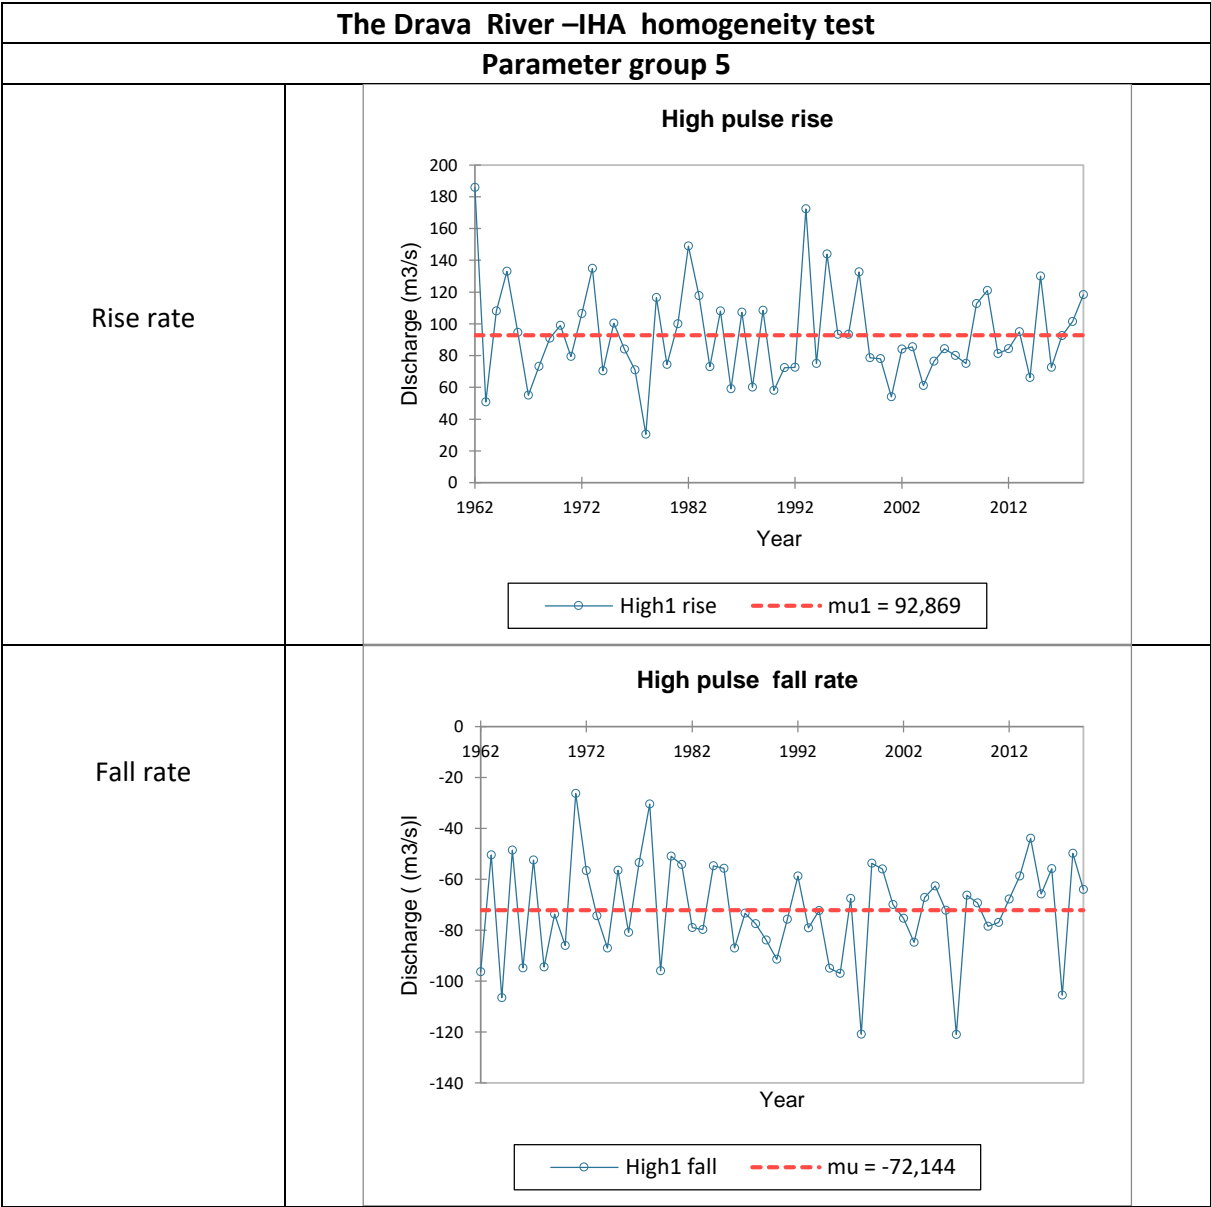

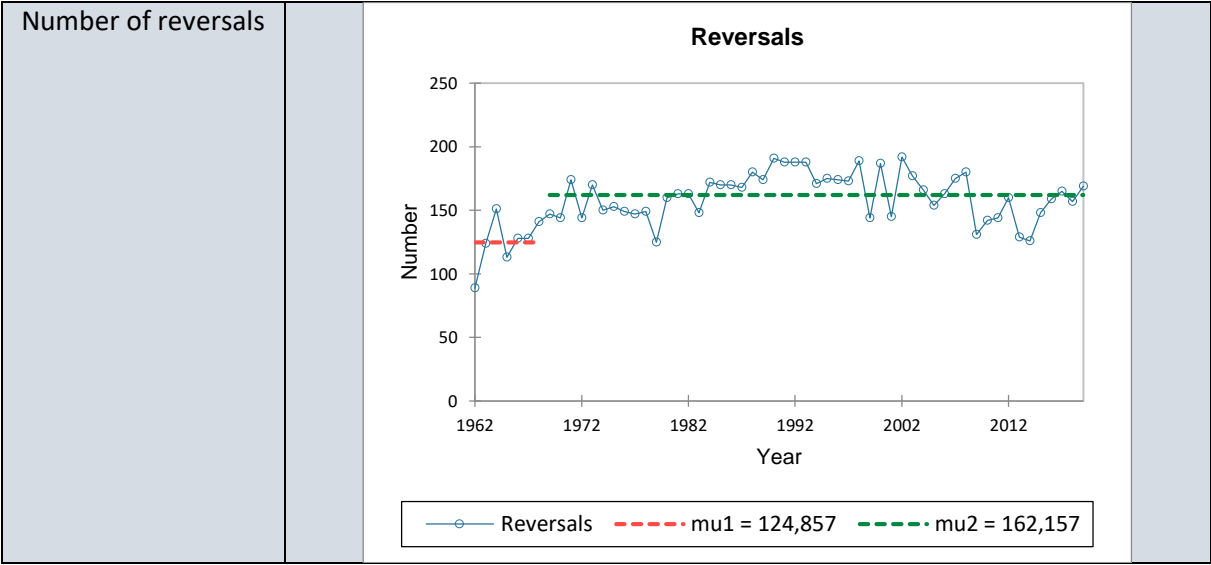

Table S3:

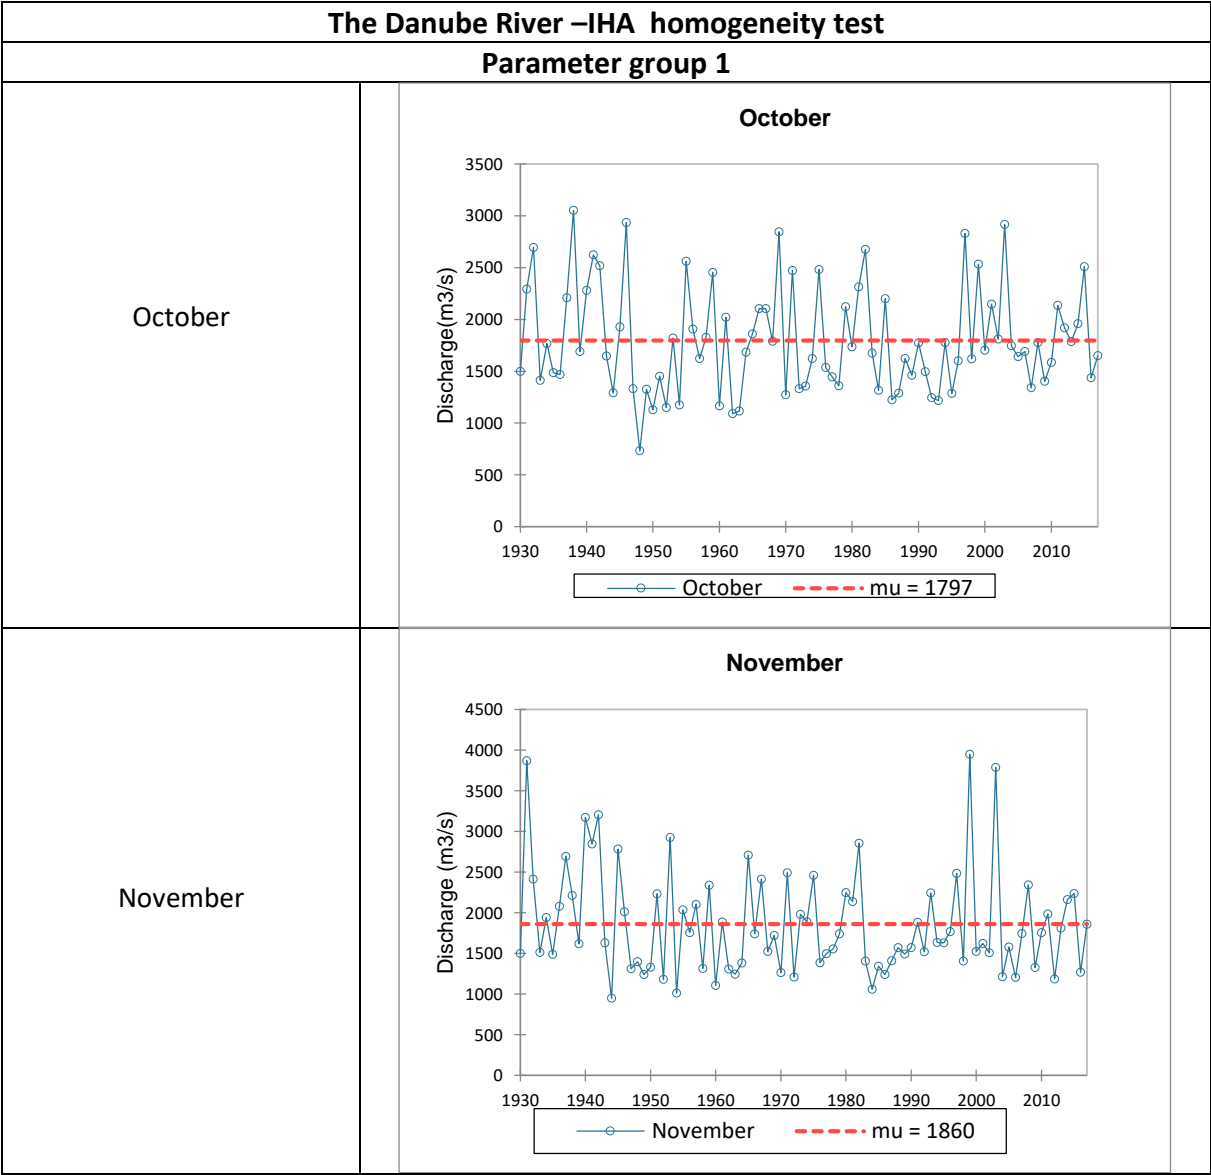

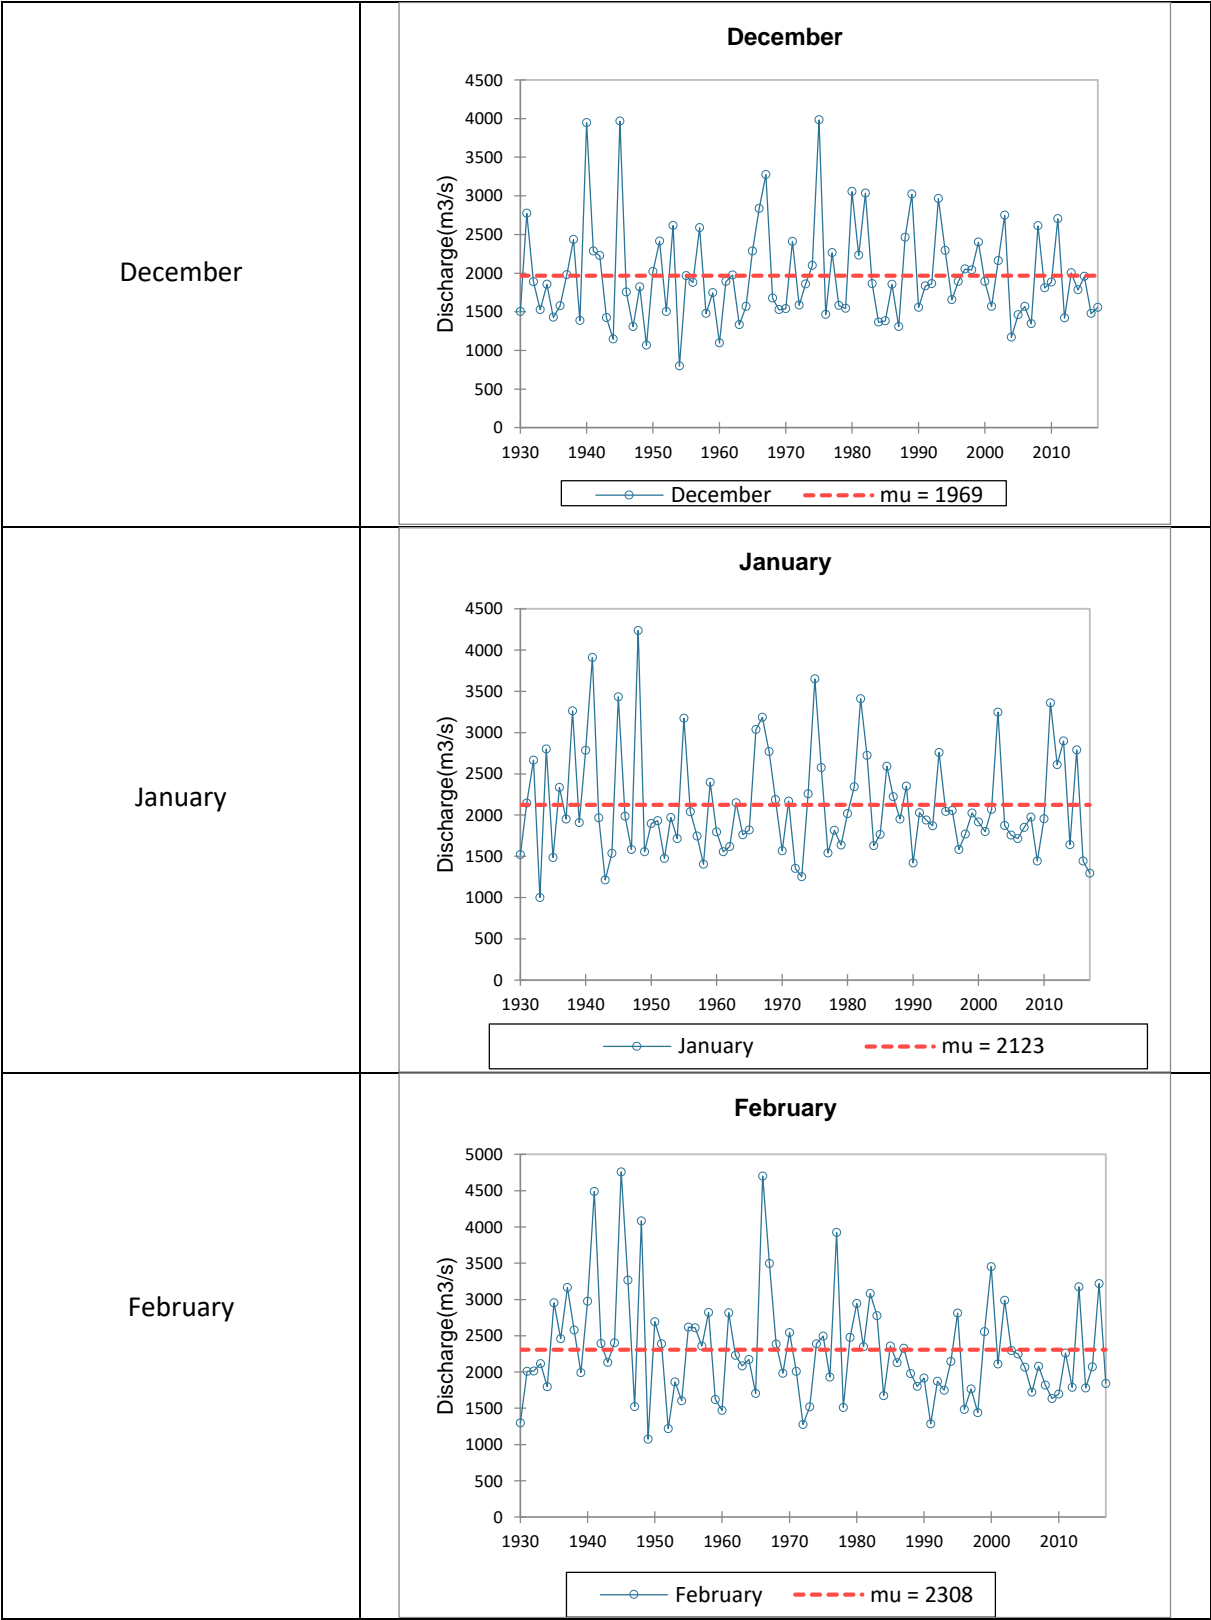

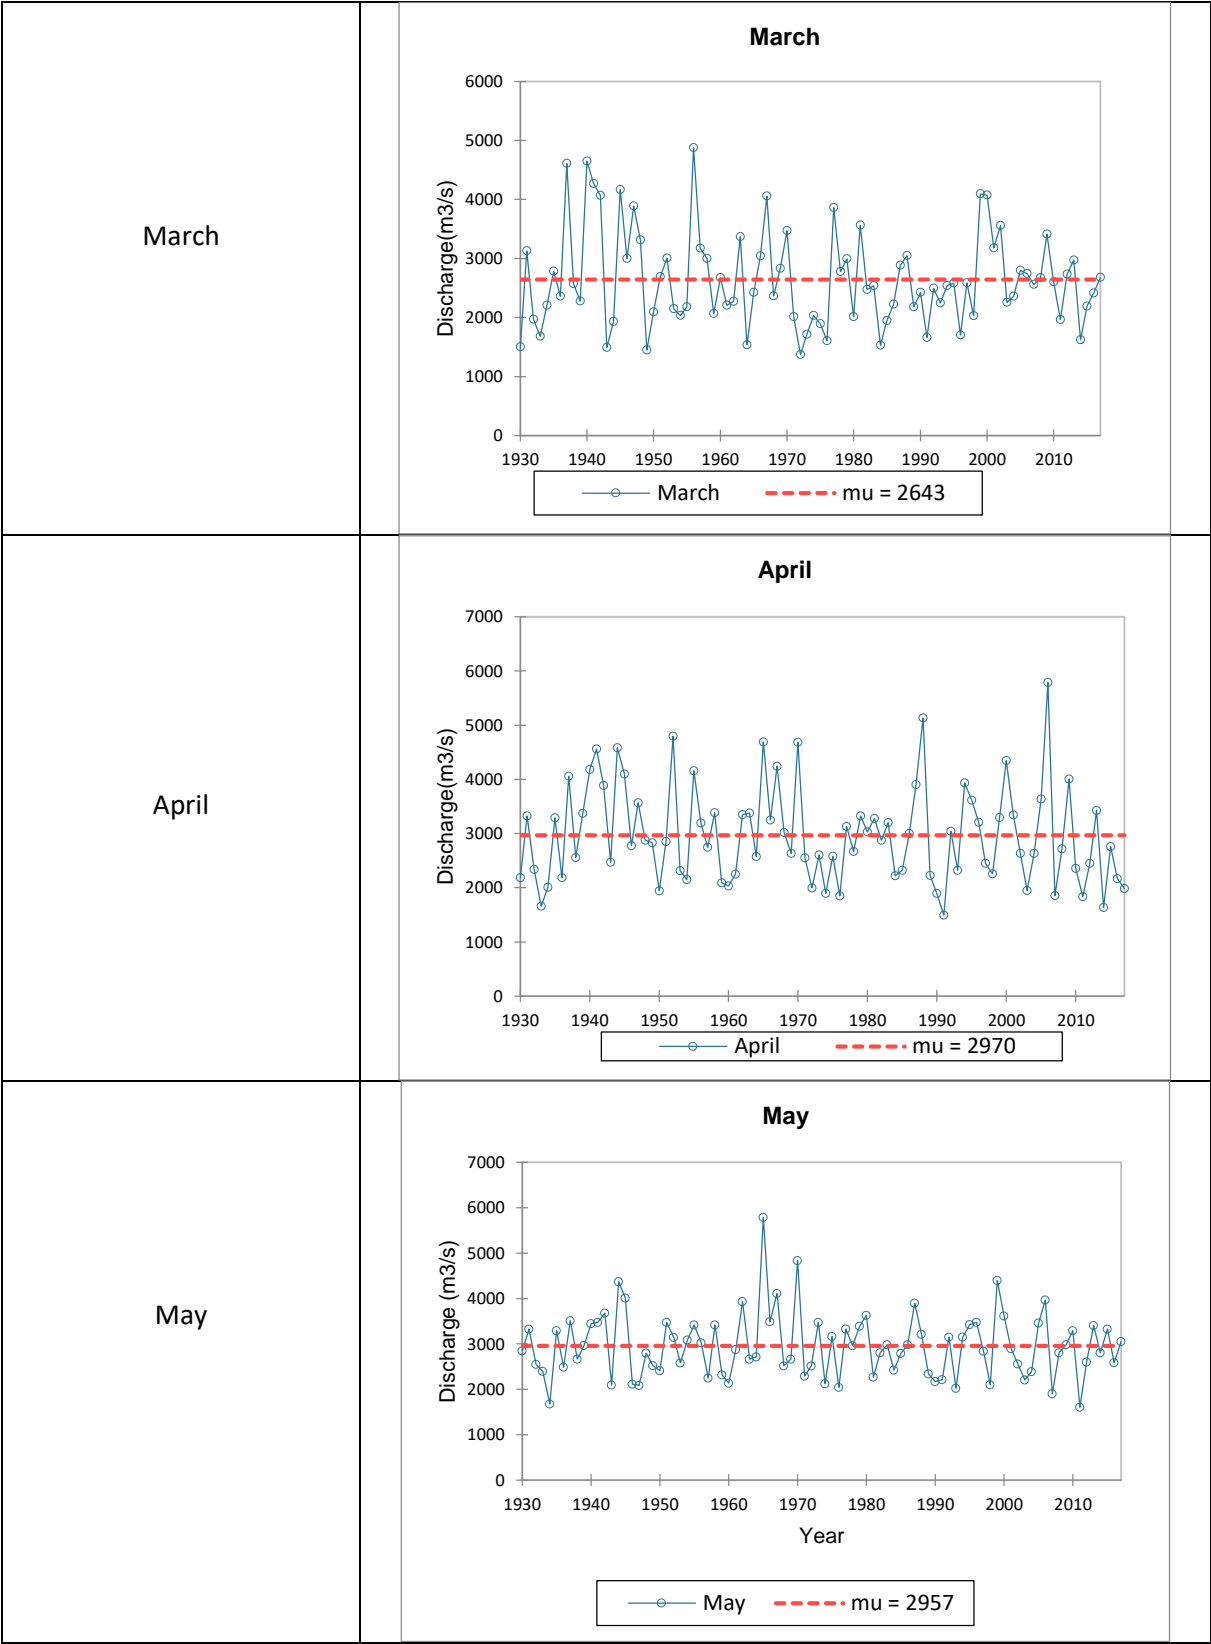

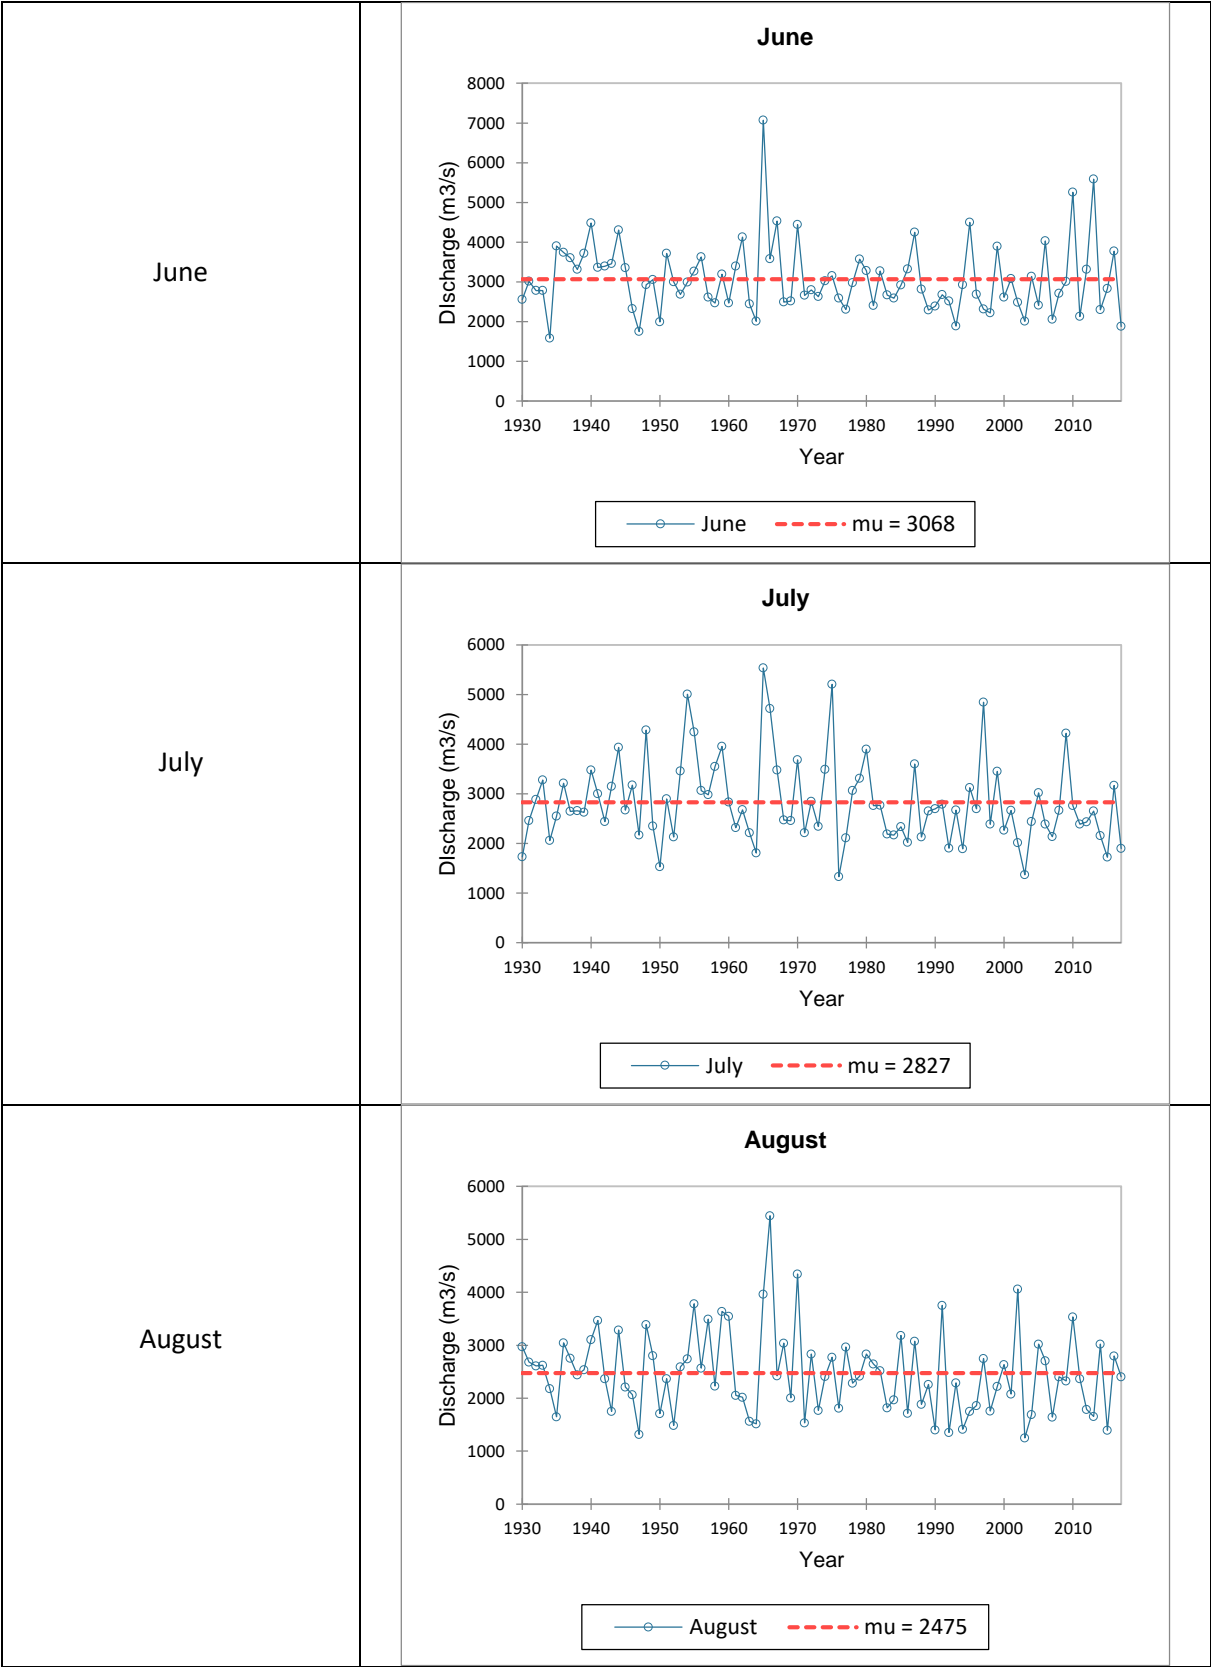

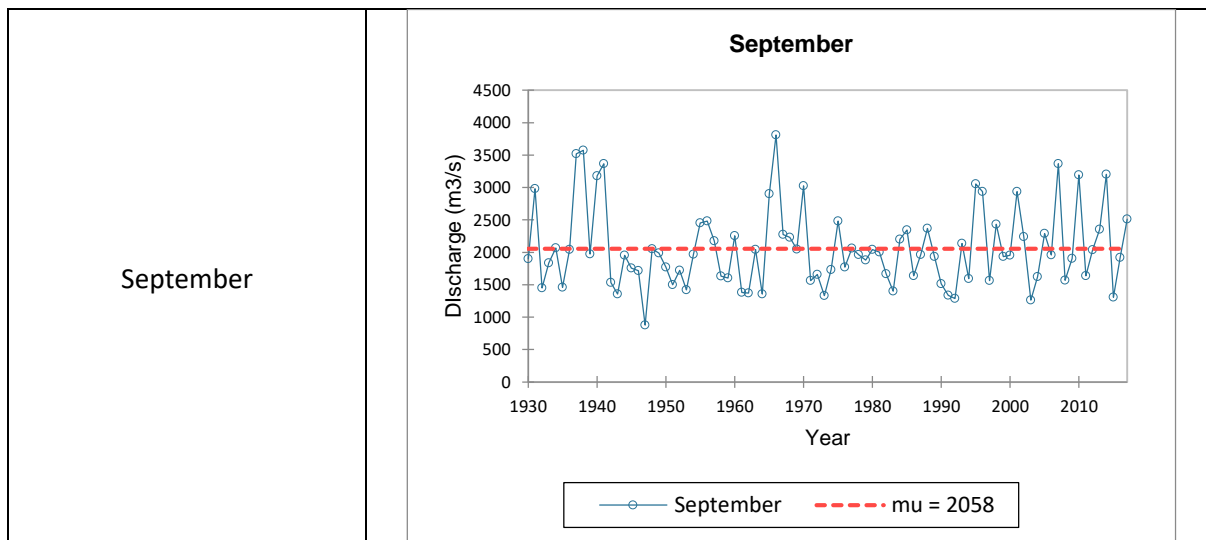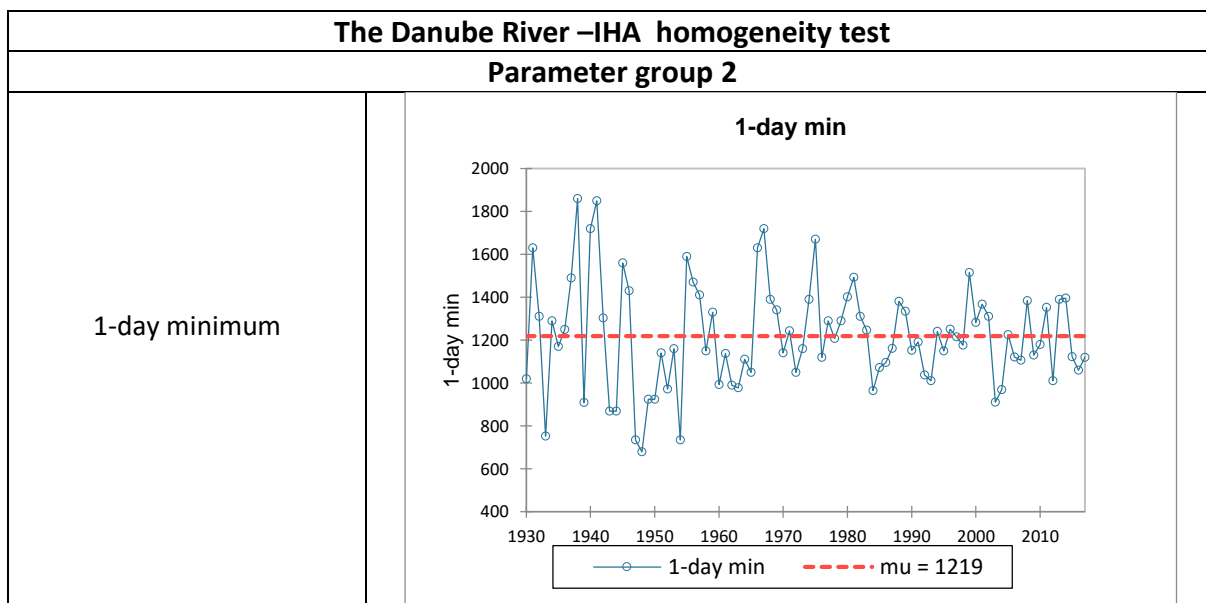

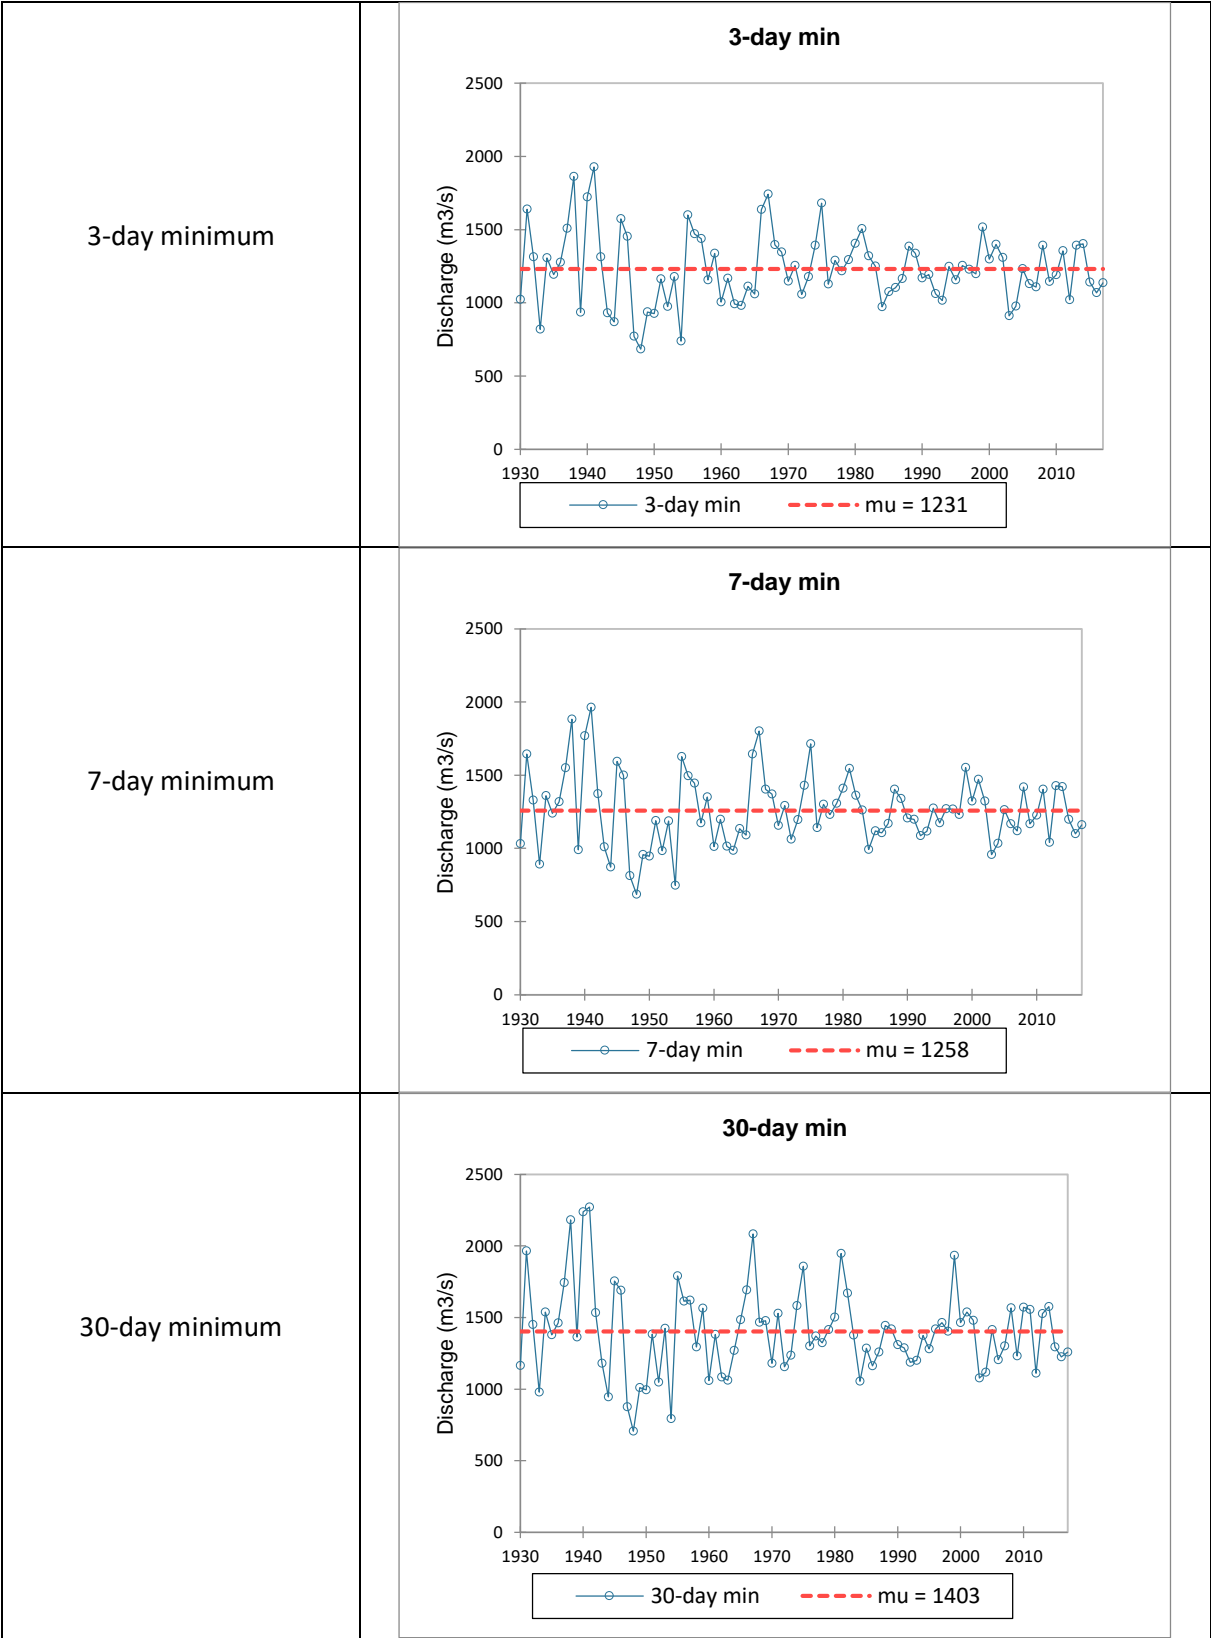

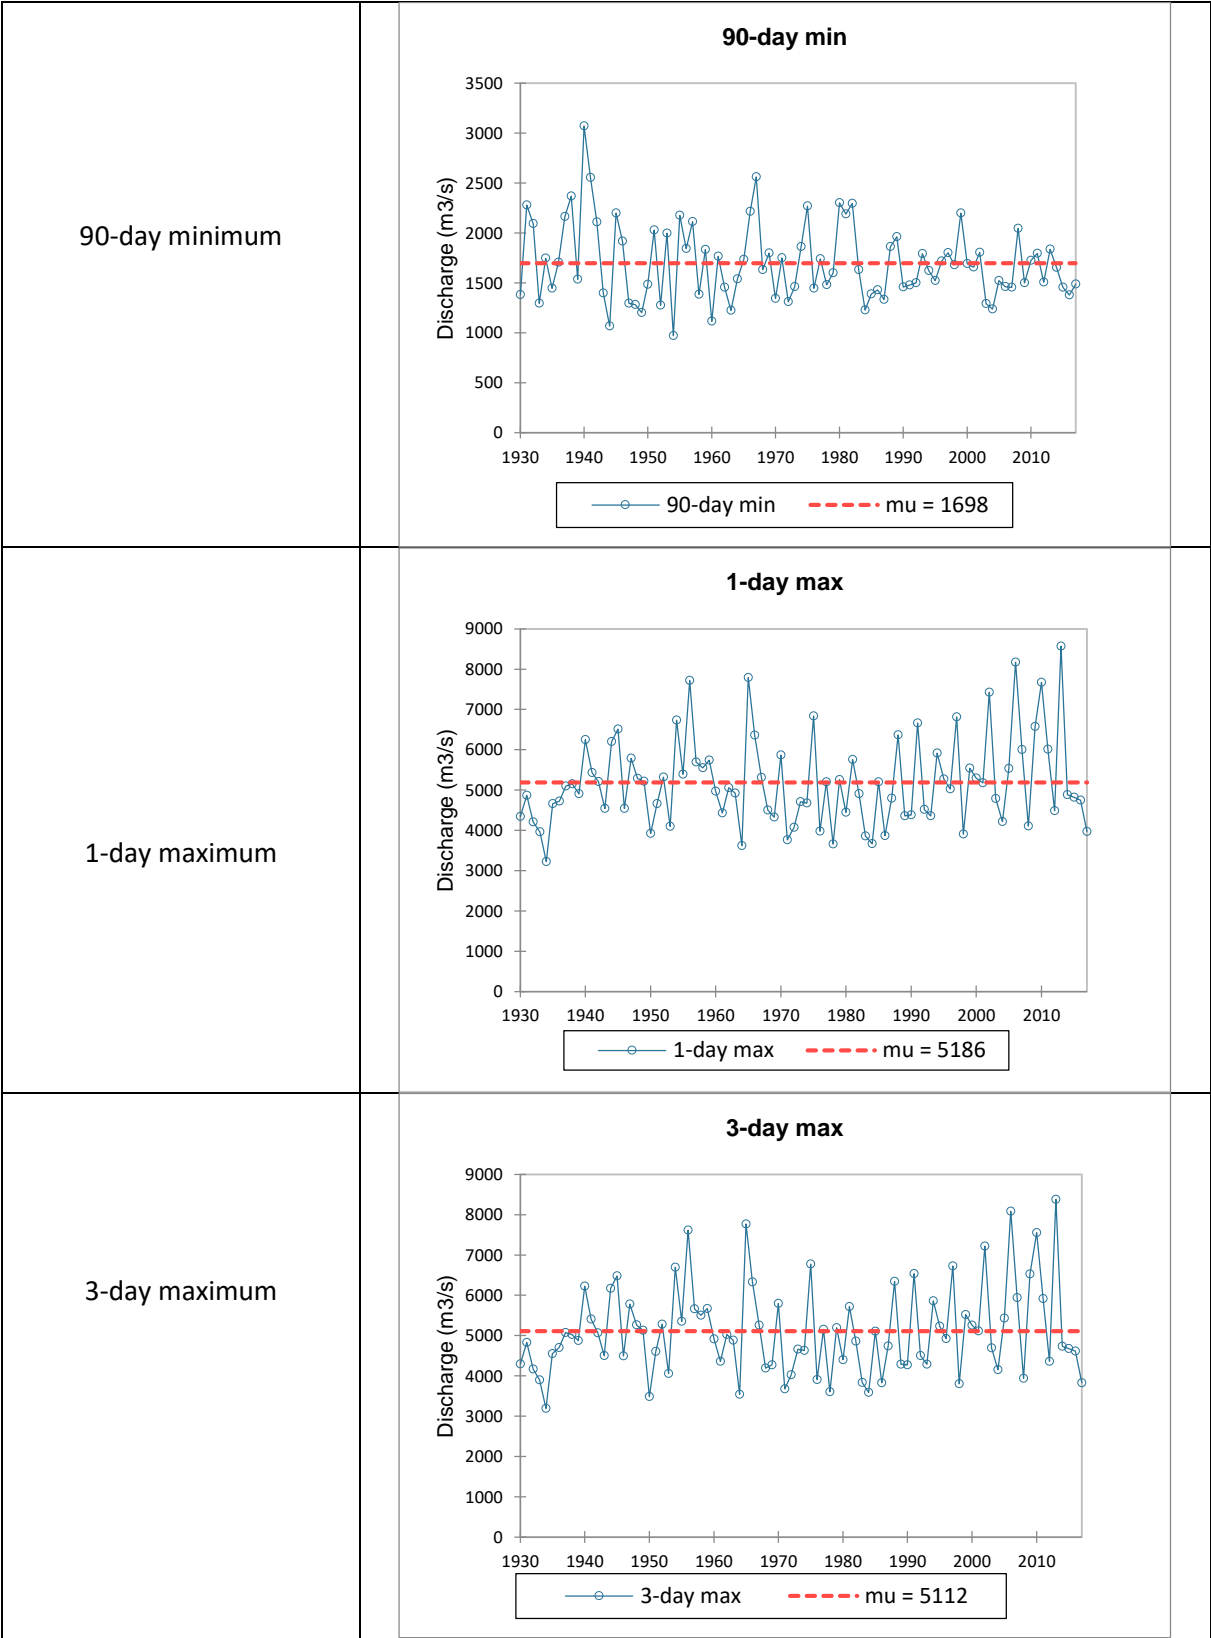

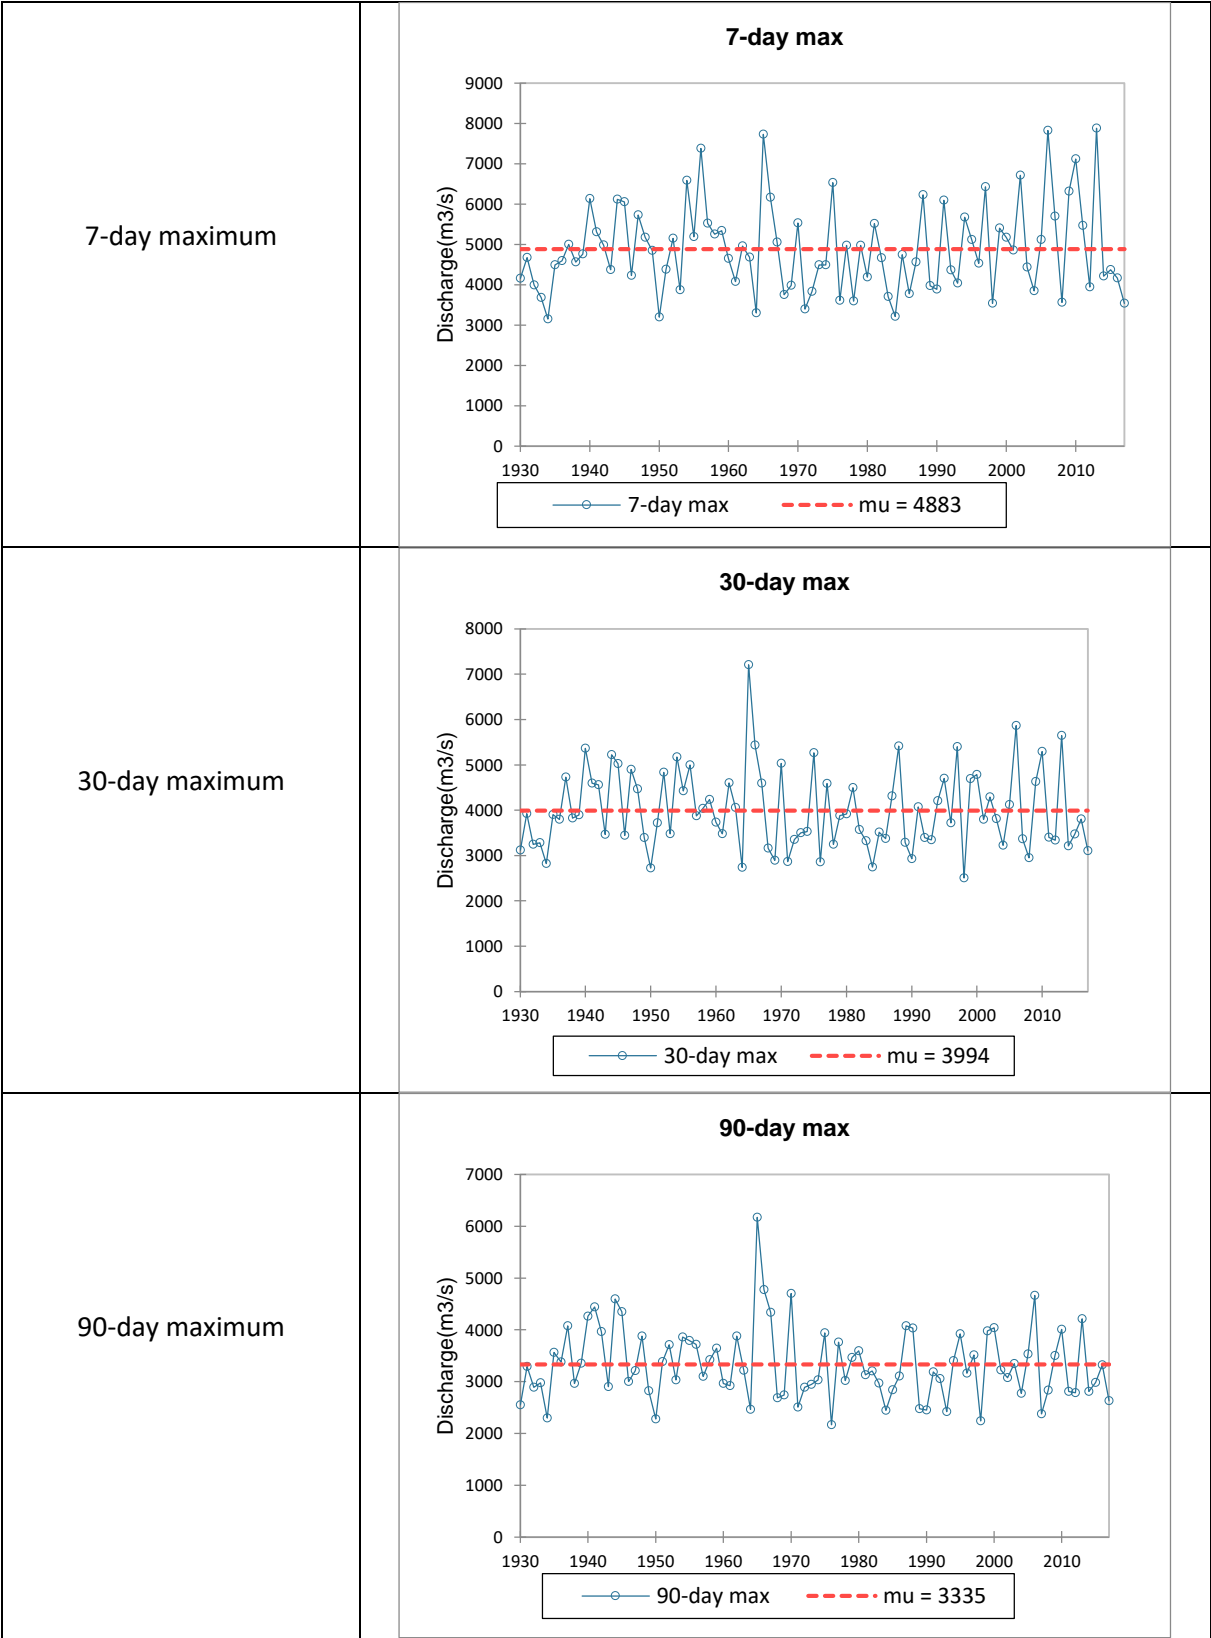

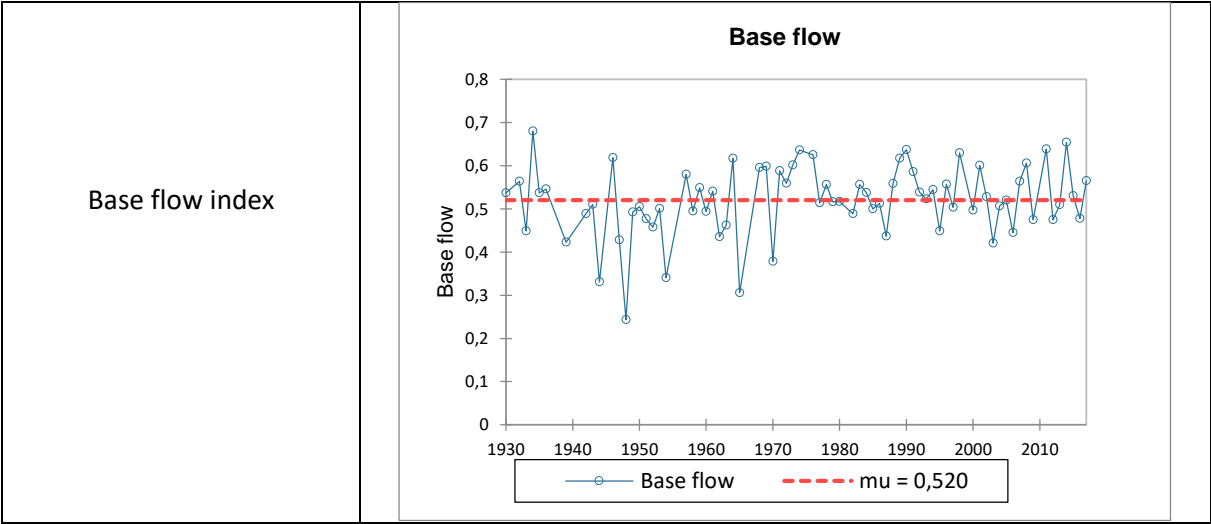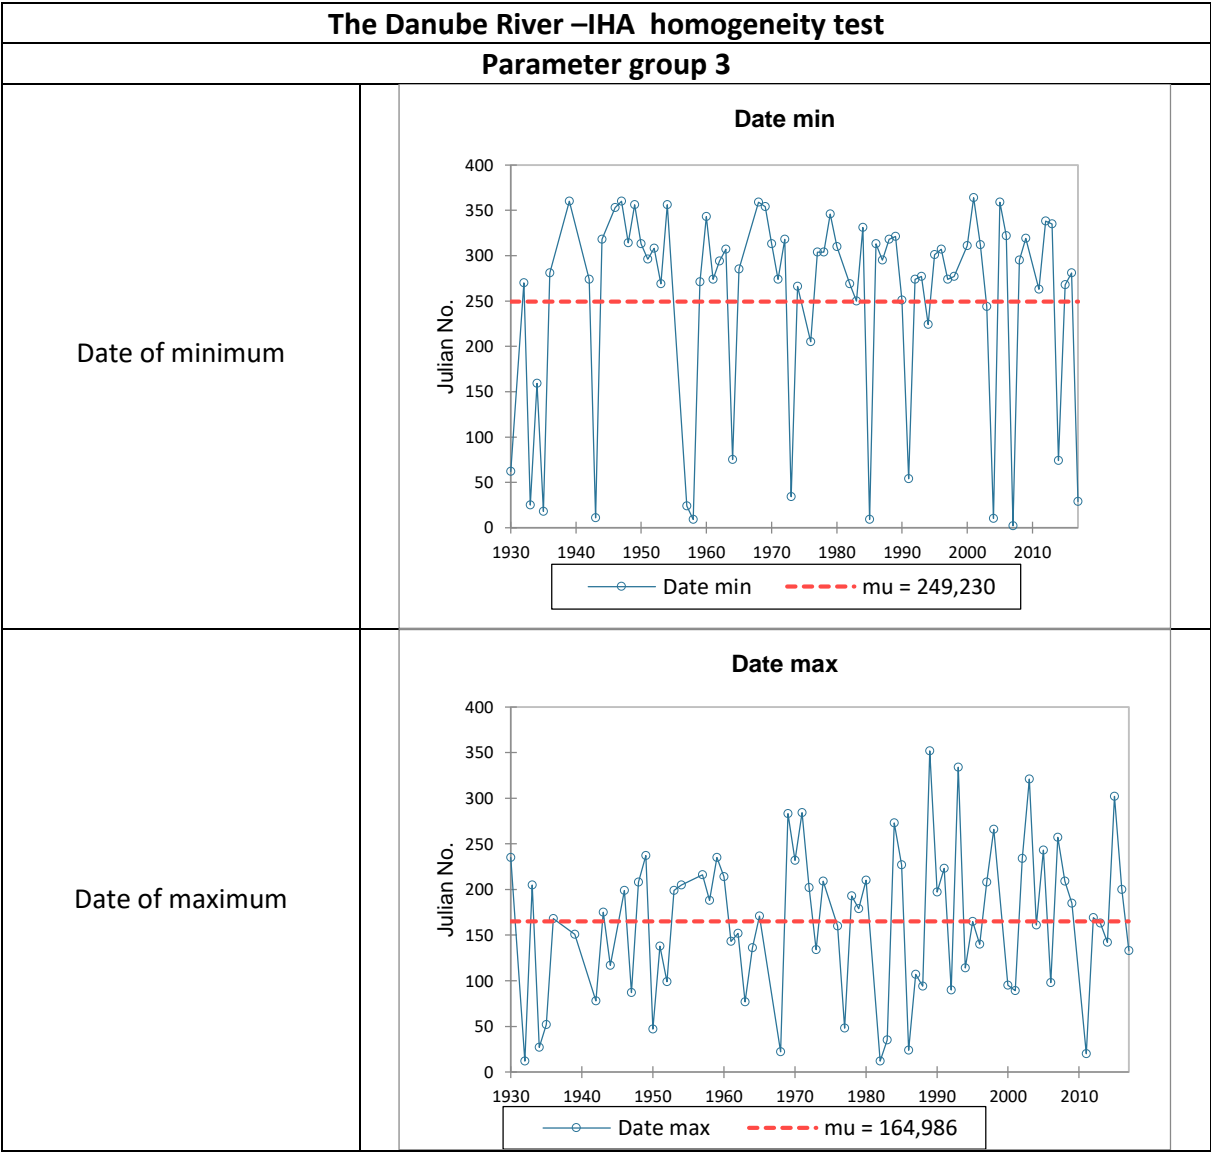

The Danube River –IHA homogeneity test

| Parameter group 4   |  |                                                                                                                                                                                                      |
|---------------------|--|------------------------------------------------------------------------------------------------------------------------------------------------------------------------------------------------------|
| Low pulse count     |  |                                                                                                                                                                                                      |
| Low pulse duration  |  |                                                                                                                                                                                                      |
| High pulse count    |  | <p><b>High pulse count</b></p> 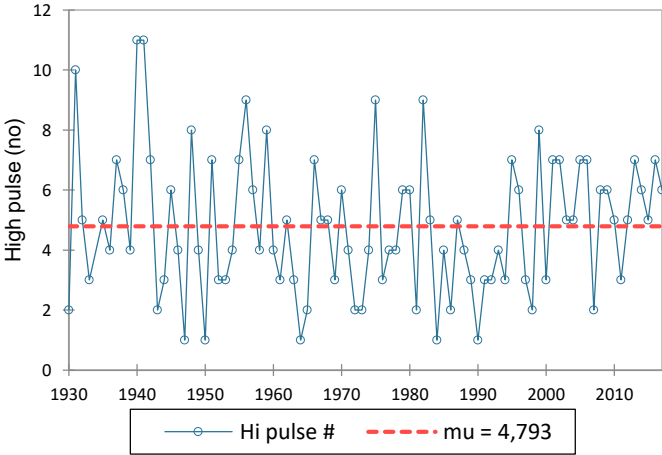 <p>High pulse (no)</p> <p>—○— Hi pulse #    - - - - mu = 4,793</p>                 |
| High pulse duration |  | <p><b>High pulse duration</b></p>  <p>High pulse duration (days)</p> <p>—○— Hi pulse L    - - - - mu = 11,801</p> |

| The Danube River –IHA homogeneity test |  |                                                                                                                                                                                                             |
|----------------------------------------|--|-------------------------------------------------------------------------------------------------------------------------------------------------------------------------------------------------------------|
| Parameter group 5                      |  |                                                                                                                                                                                                             |
| Rise rate                              |  | <p><b>Rise rate</b></p> 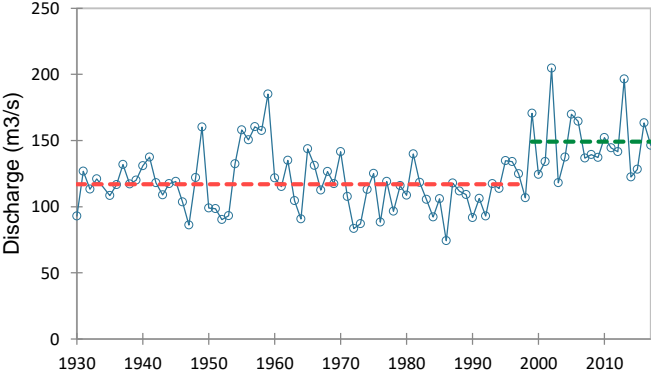 <p>Discharge (m3/s)</p> <p>—○— Rise rate    - - - - mu1 = 117,003    - - - - mu2 = 149,026</p> |

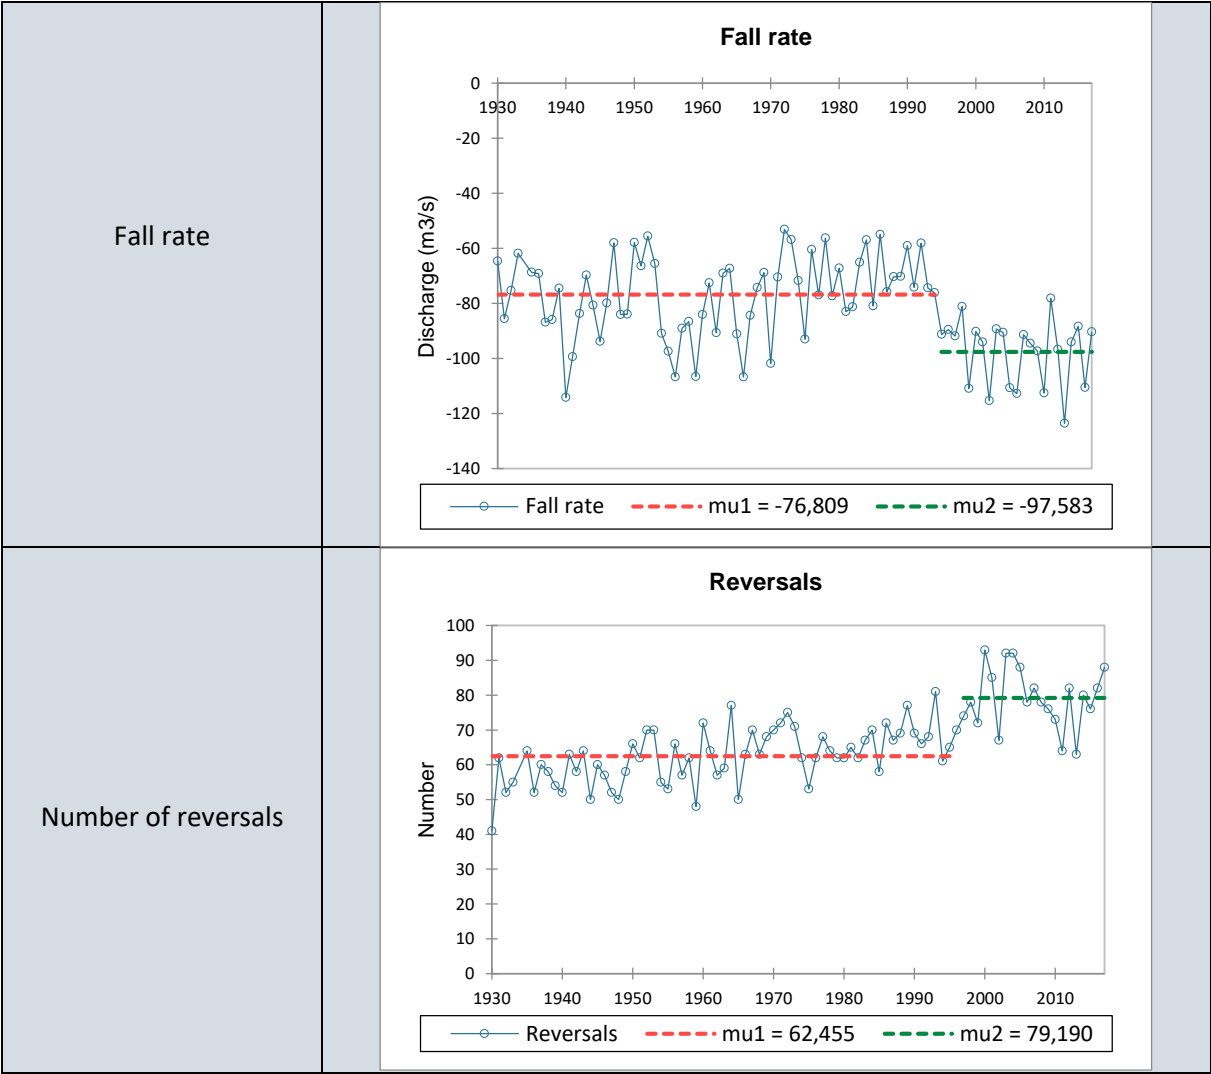

Supplement: s1 [file s1]
